# Supplementary material for: Diastereoselective synthesis of trisubstituted olefins using a silicon-tether ring-closing metathesis strategy
Source: Royal Society of Chemistry journal article supplement (doi:10.1039/c9ob02563d), 2020-01-01

## Supporting Information

### Diastereoselective Synthesis of Trisubstituted Olefins using a Silicon-Tether Ring-Closing Metathesis Strategy

*Stéphane Wittmann,<sup>#</sup> Alexander F. Tiniakos, and Joëlle Prunet\**

WestCHEM, School of Chemistry, University of Glasgow, Joseph Black Building, University Avenue, Glasgow G12 8QQ, UK

joelle.prunet@glasgow.ac.uk

#### Contents

|                  |    |
|------------------|----|
| NMR spectra..... | S2 |
|------------------|----|

# Allyldimethyl(5-phenylpent-1-en-3-yloxy)silane 2

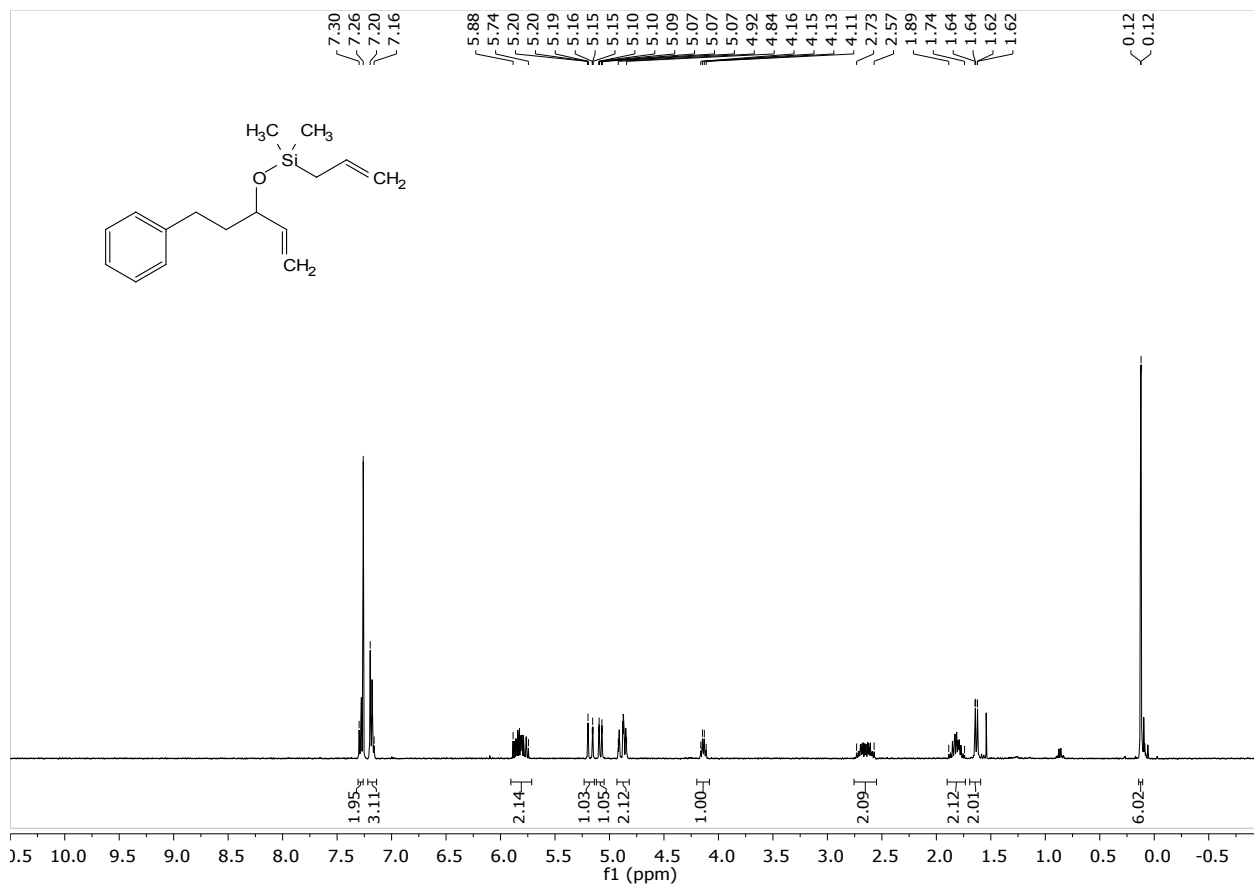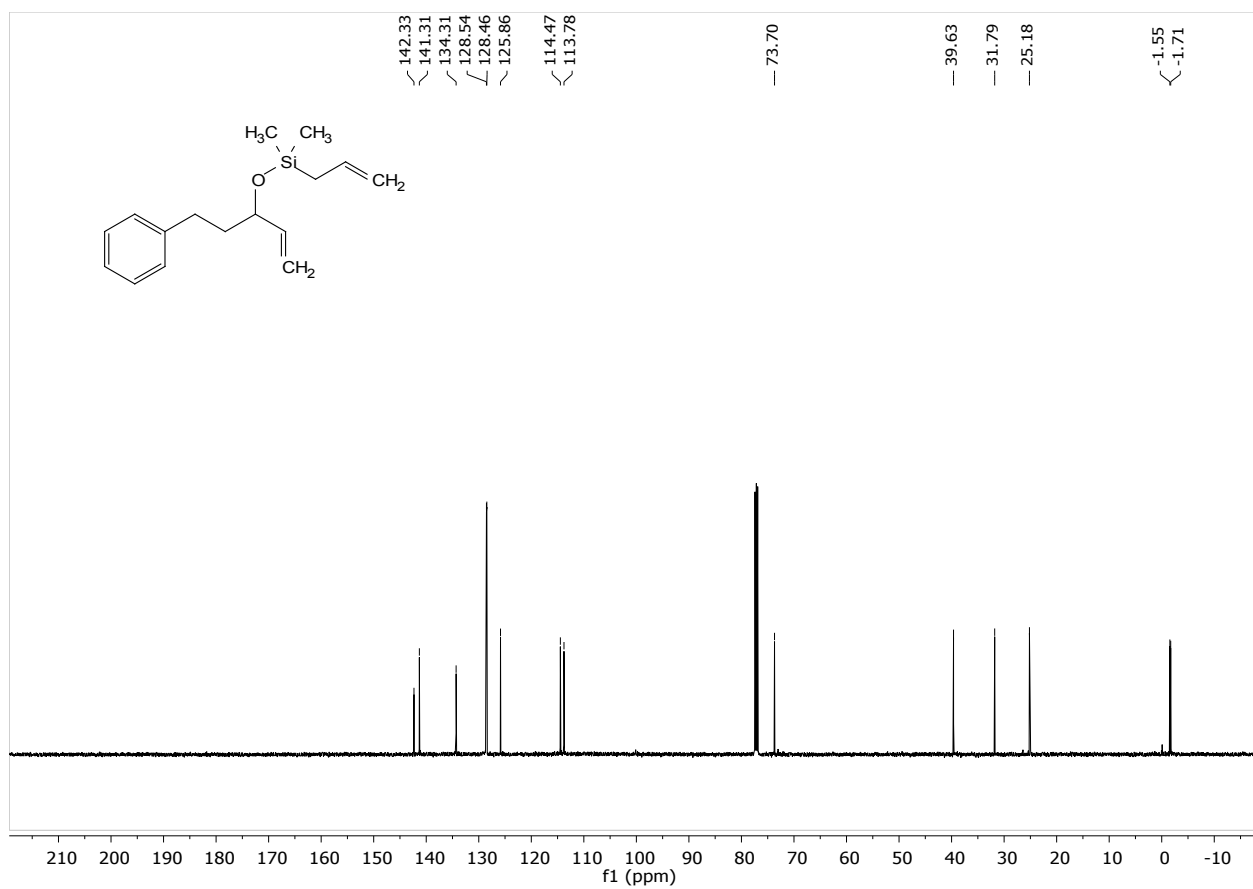

**2,2-Dimethyl-6-phenethyl-3,6-dihydro-2H-1,2-oxasiline 3**

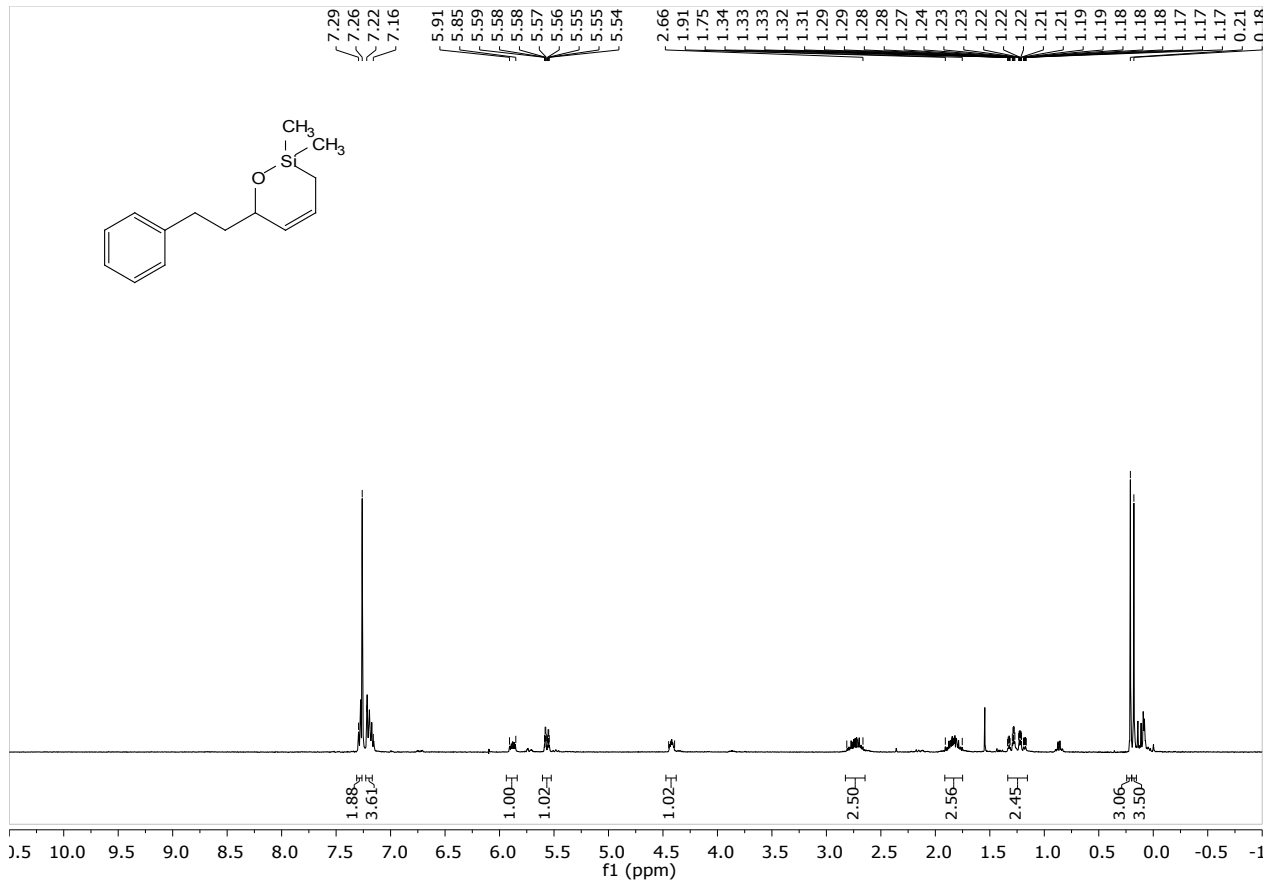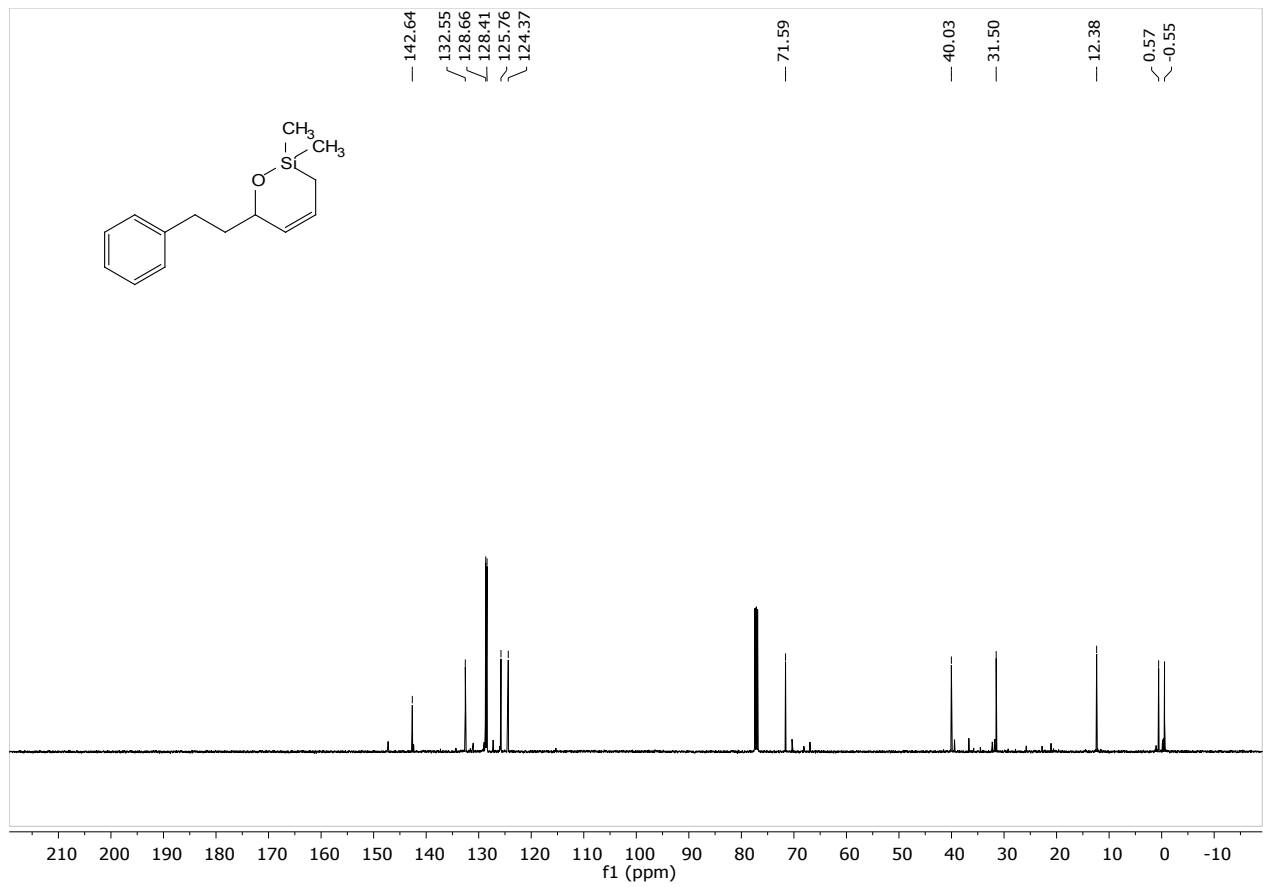

# Trimethyl(2-methyleneheptyl)silane 5a

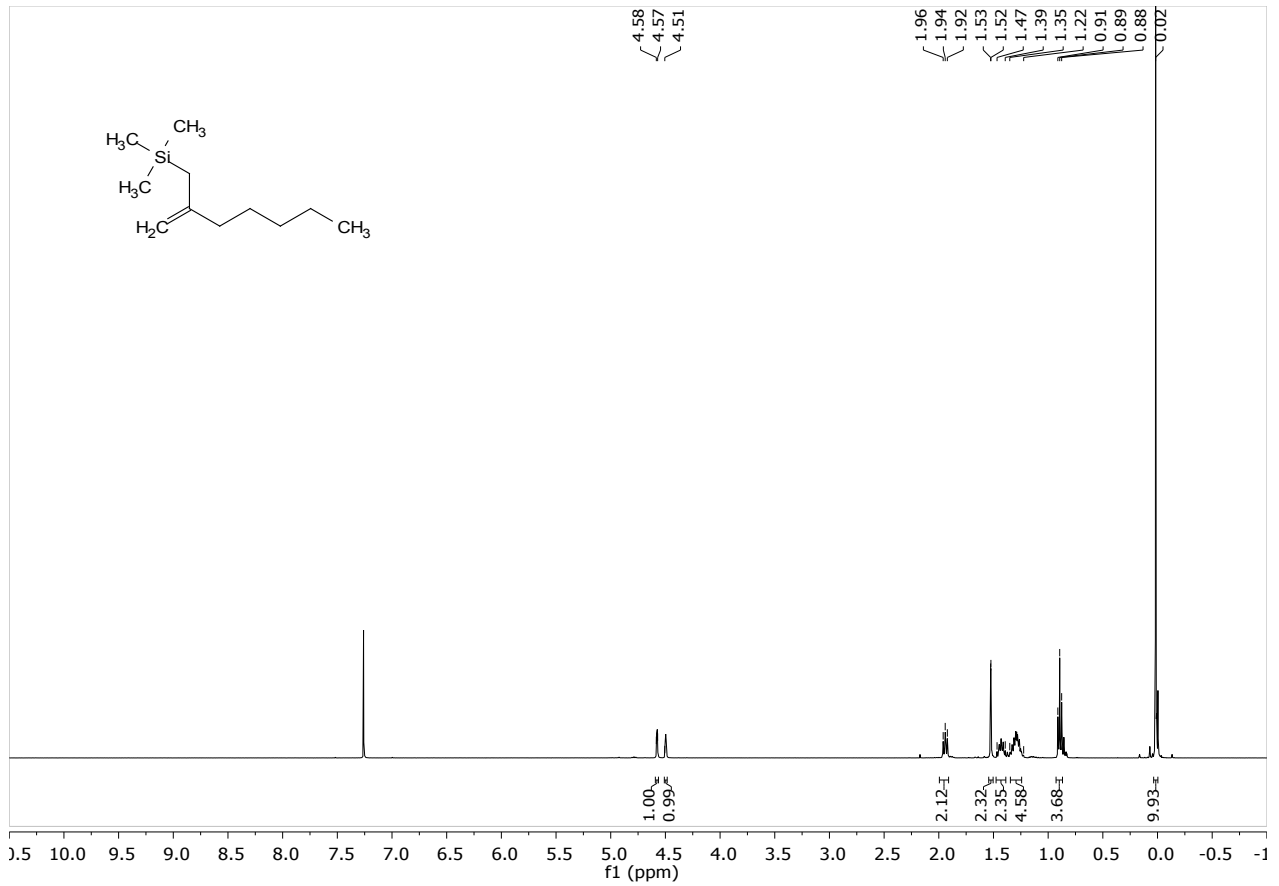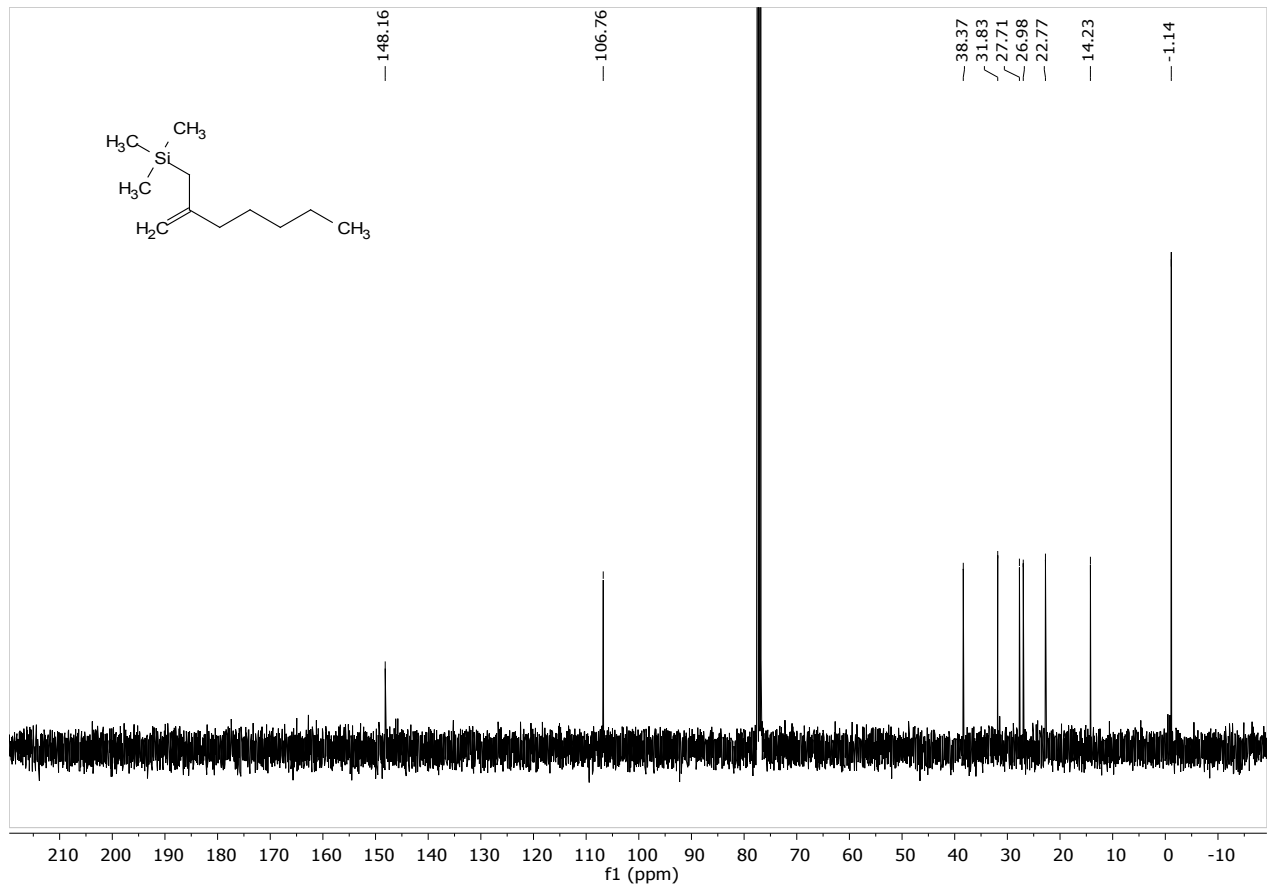

Triethyl(2-((trimethylsilyl)methyl)hept-1-en-4-yloxy)silane 5b

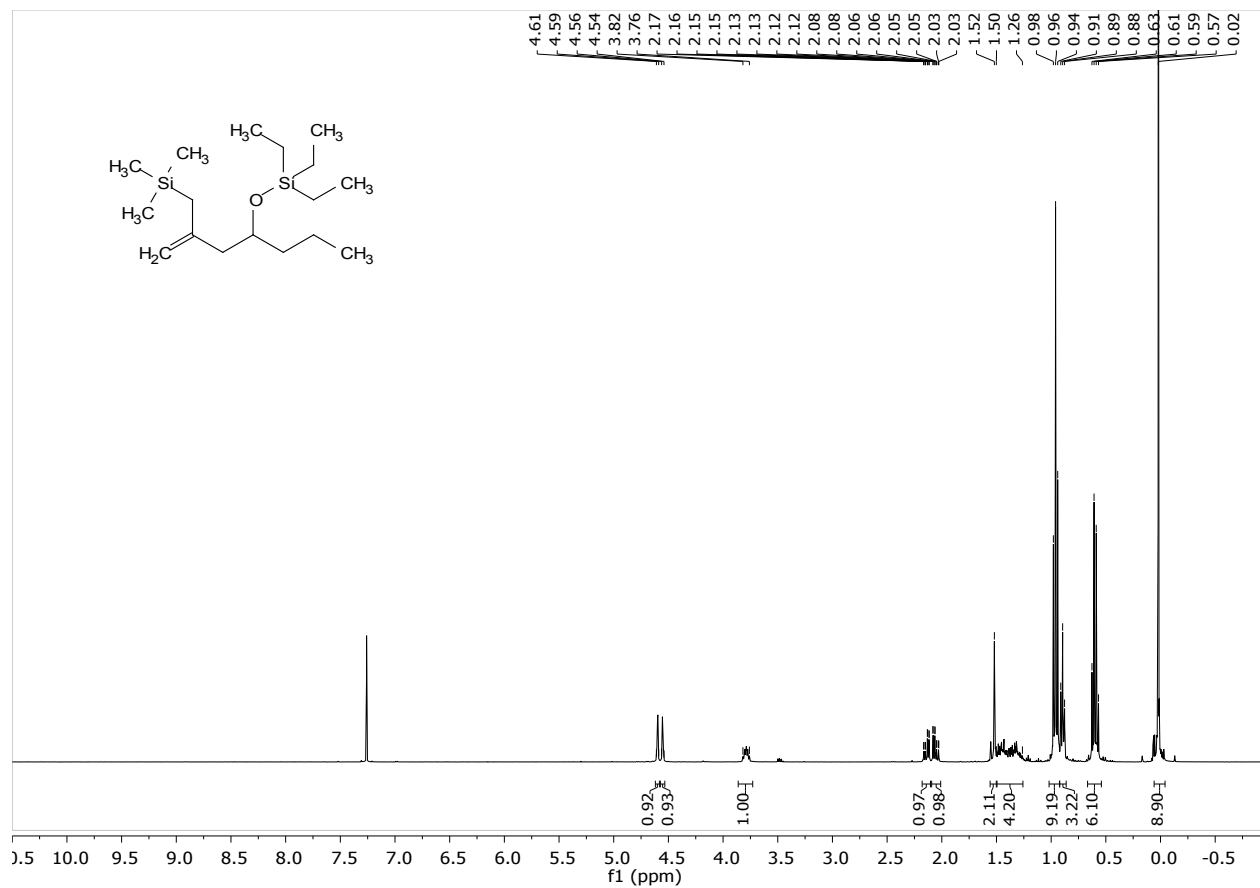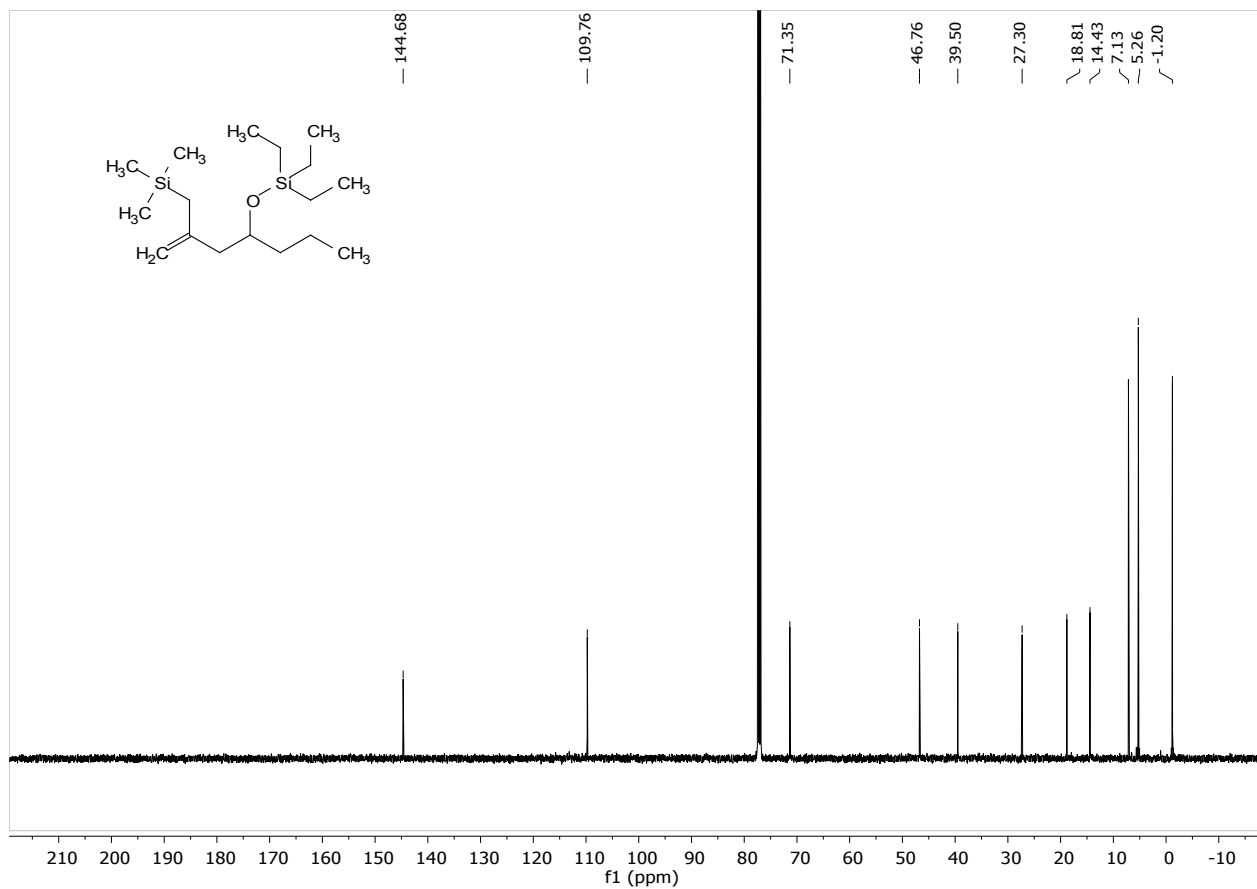

**(4-(Benzyloxy)-2-methyleneheptyl)trimethylsilane 5c**

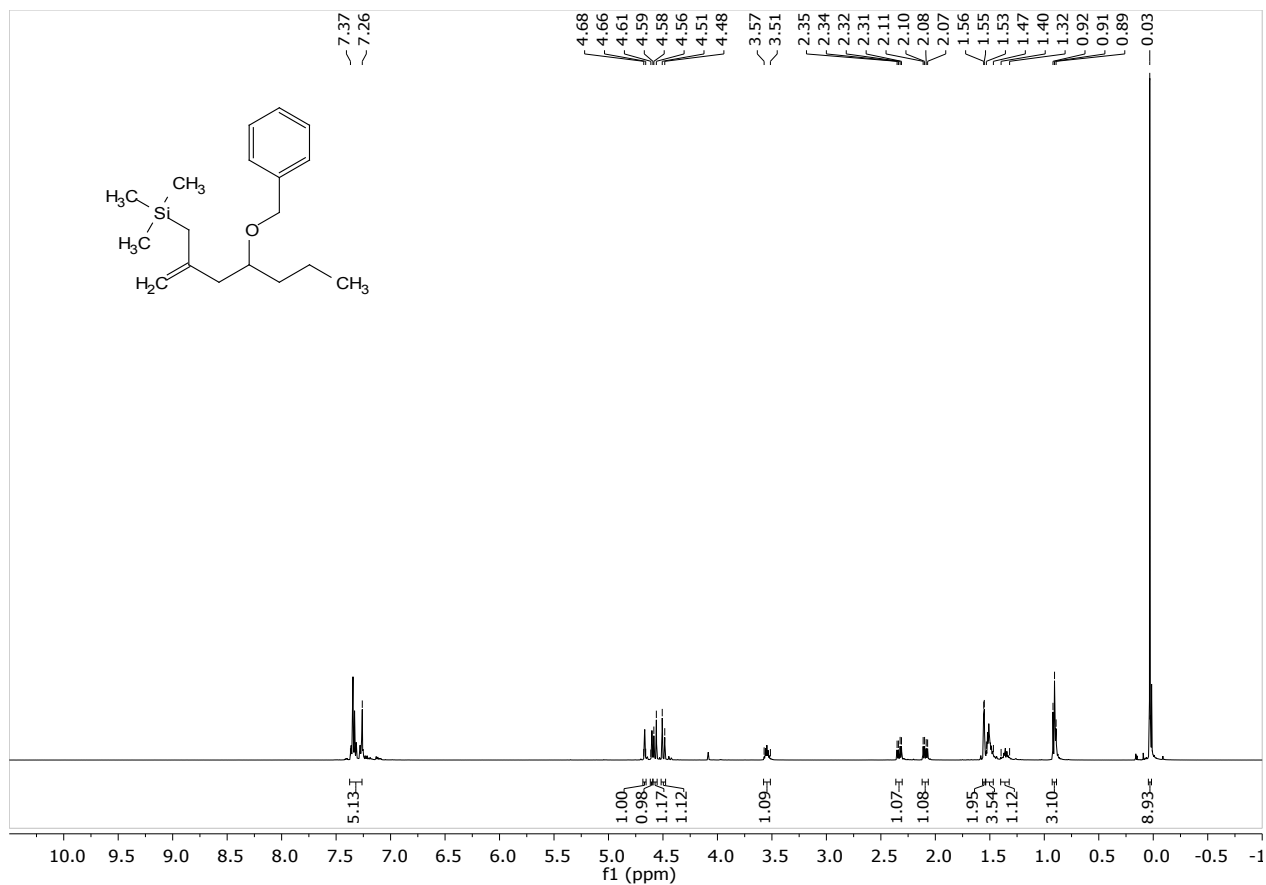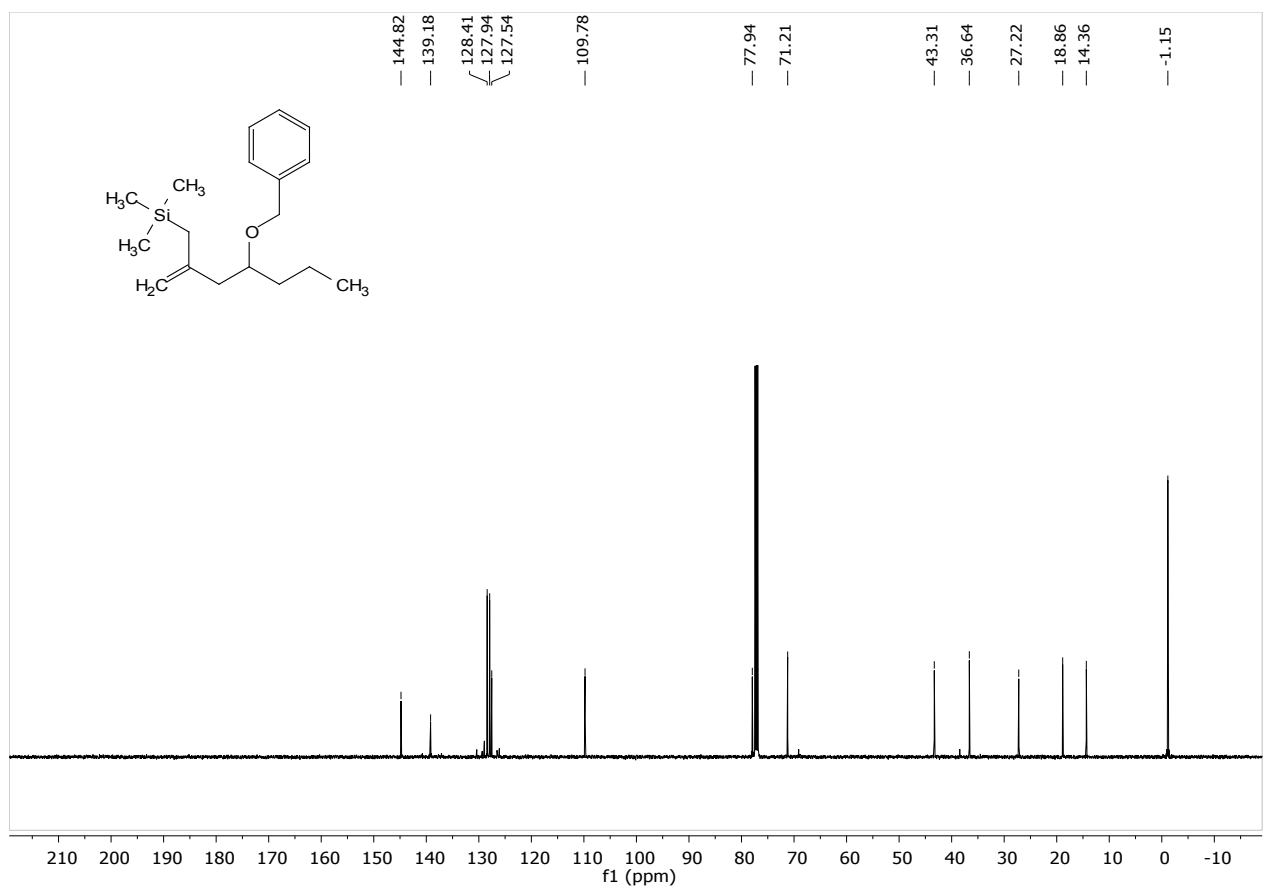

## 2-(Bromomethyl)hept-1-ene 7a

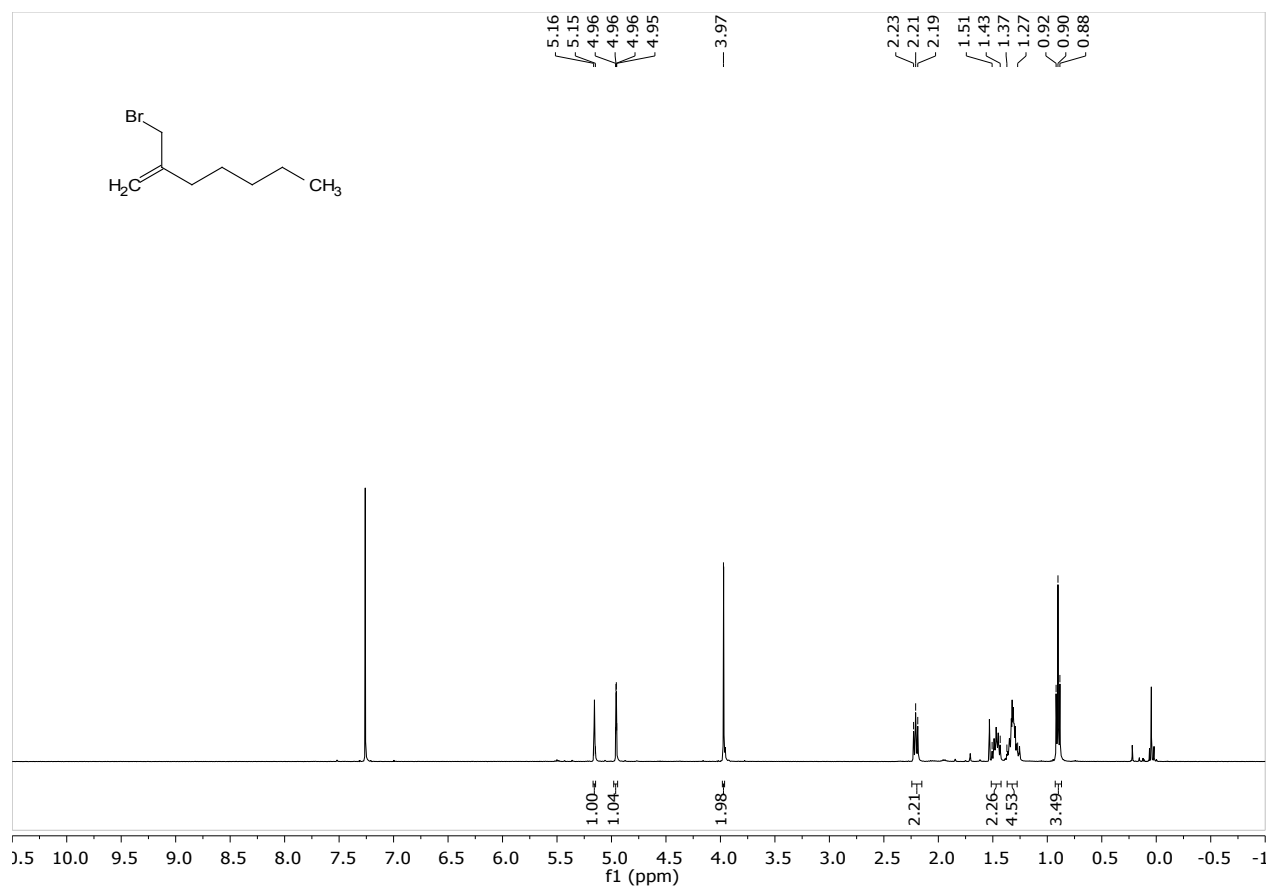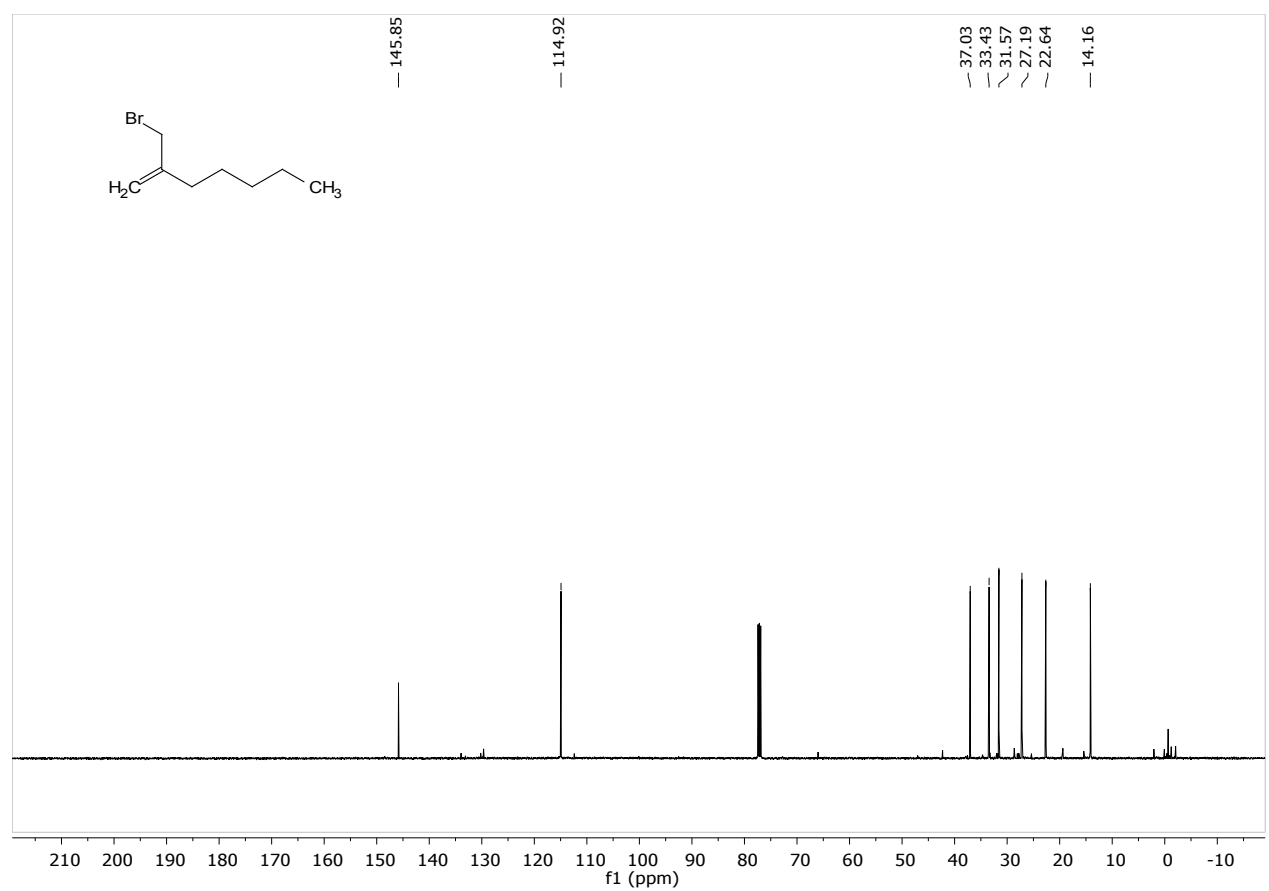

**(2-(Bromomethyl)hept-1-en-4-yloxy)triethylsilane 7b**

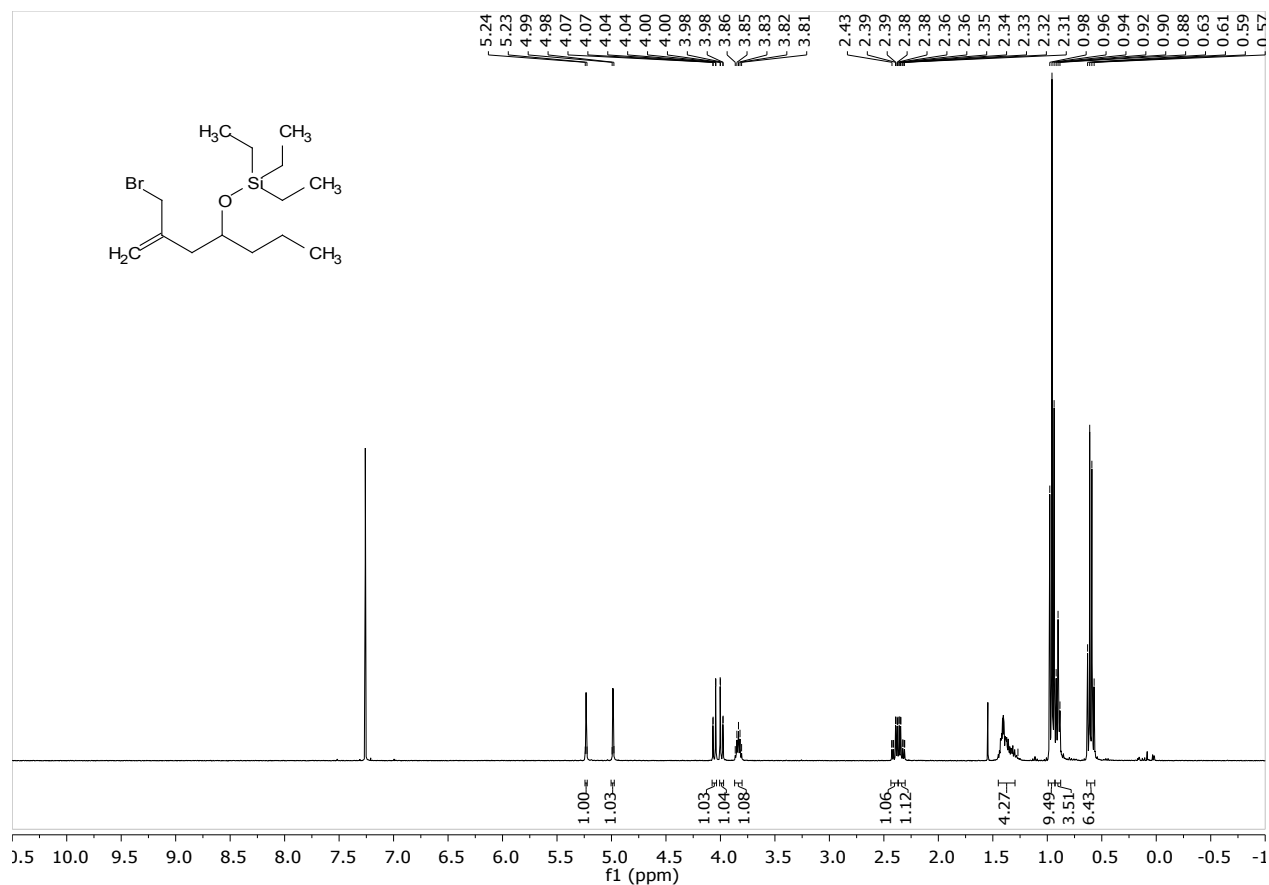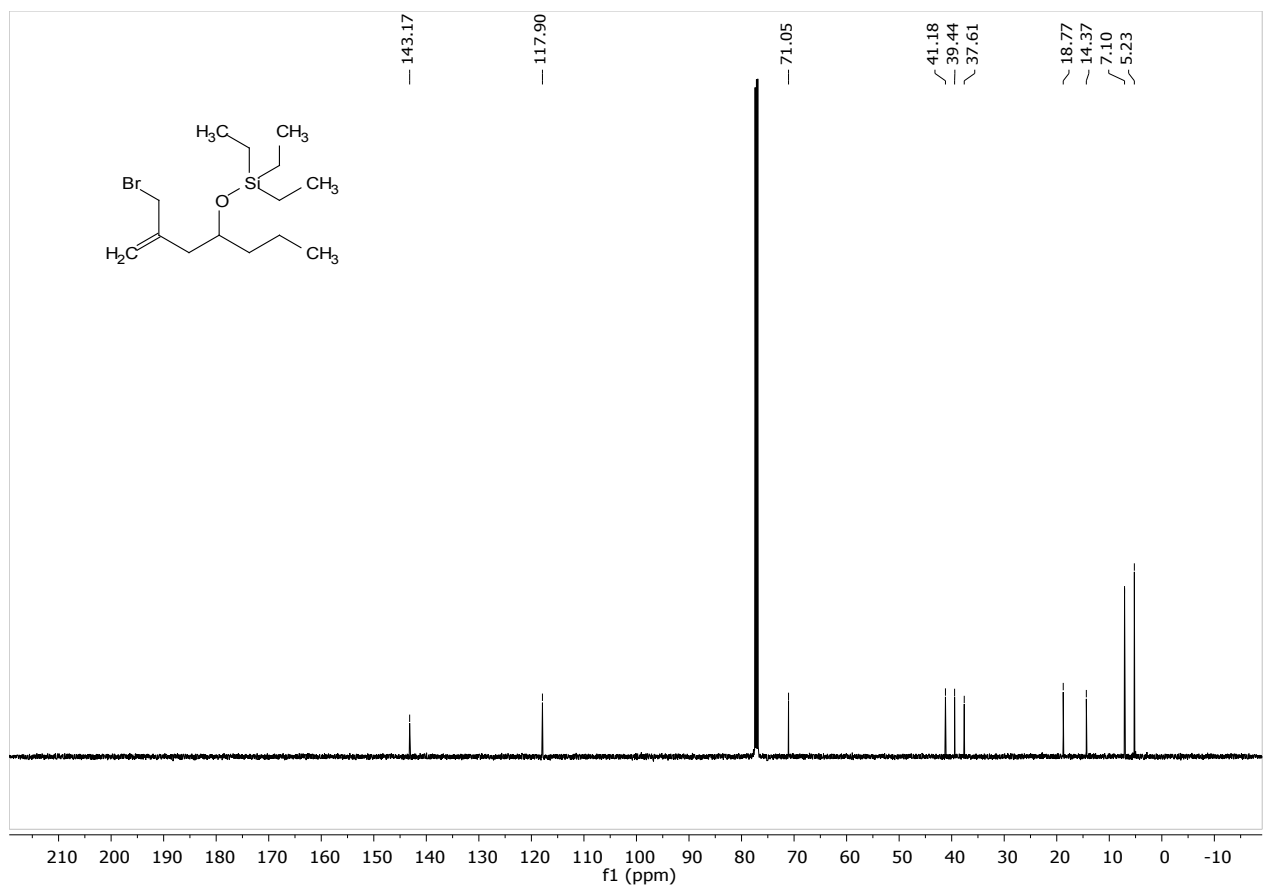



**(((2-(Bromomethyl)hept-1-en-4-yl)oxy)methyl)benzene 7c**

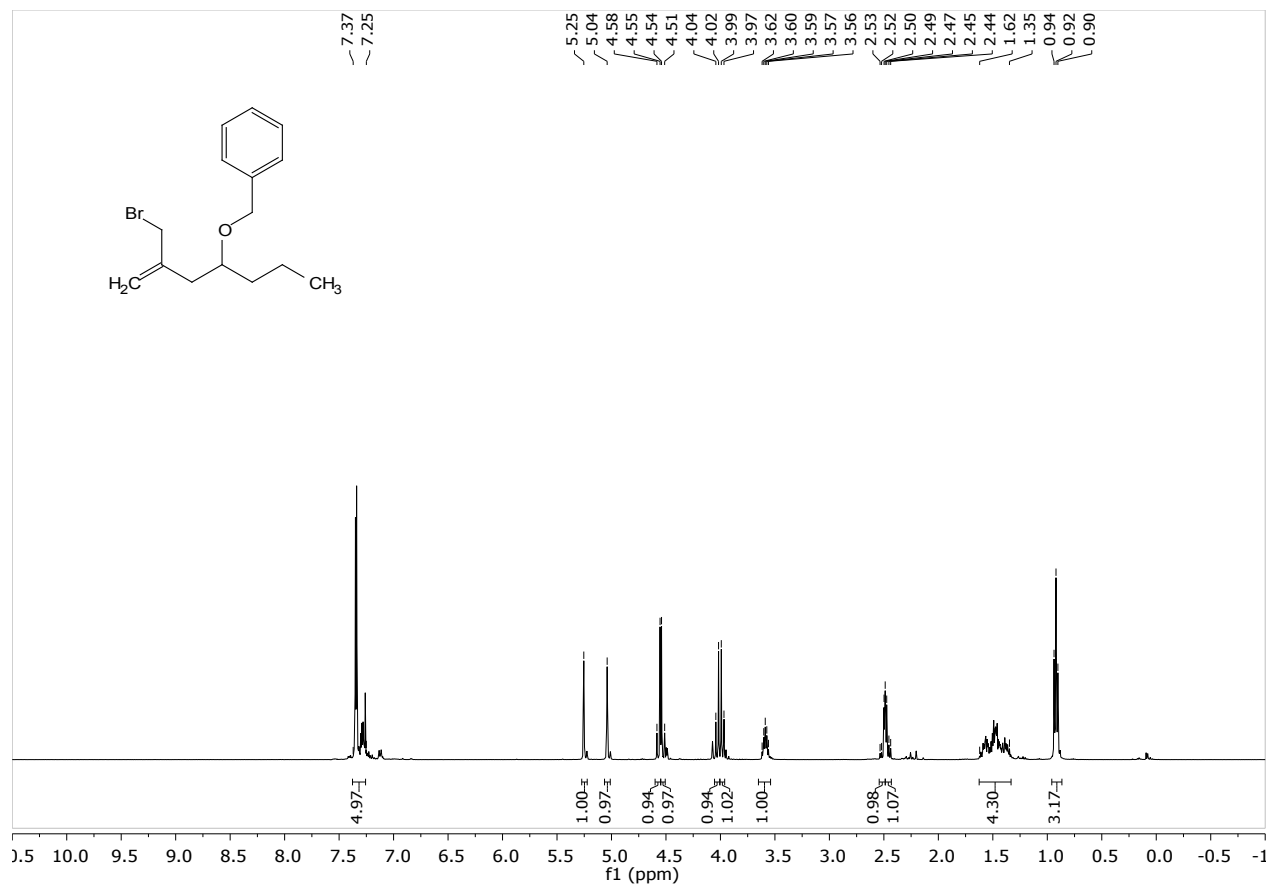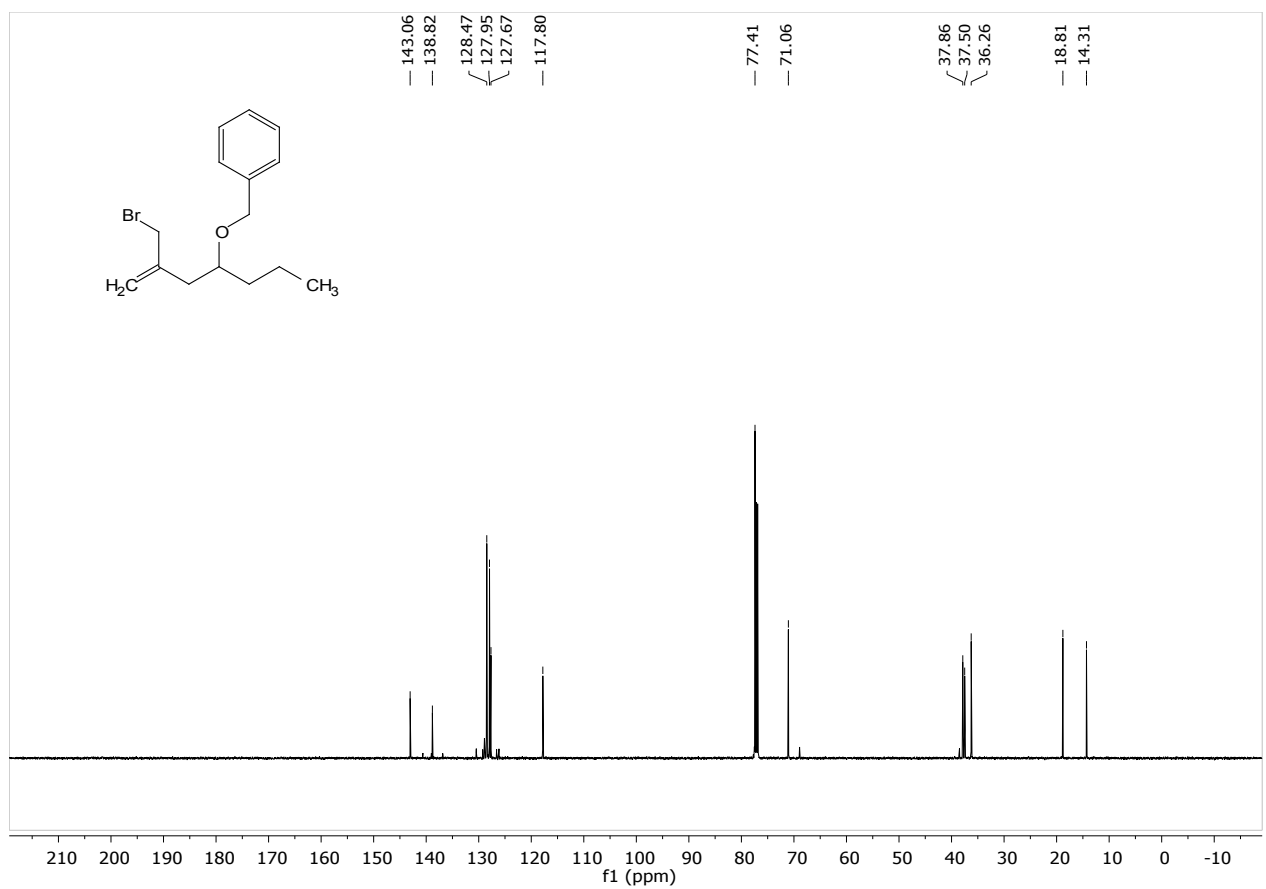

1-((2-(Bromomethyl)hept-1-en-4-yloxy)methyl)-4-methoxybenzene 7d

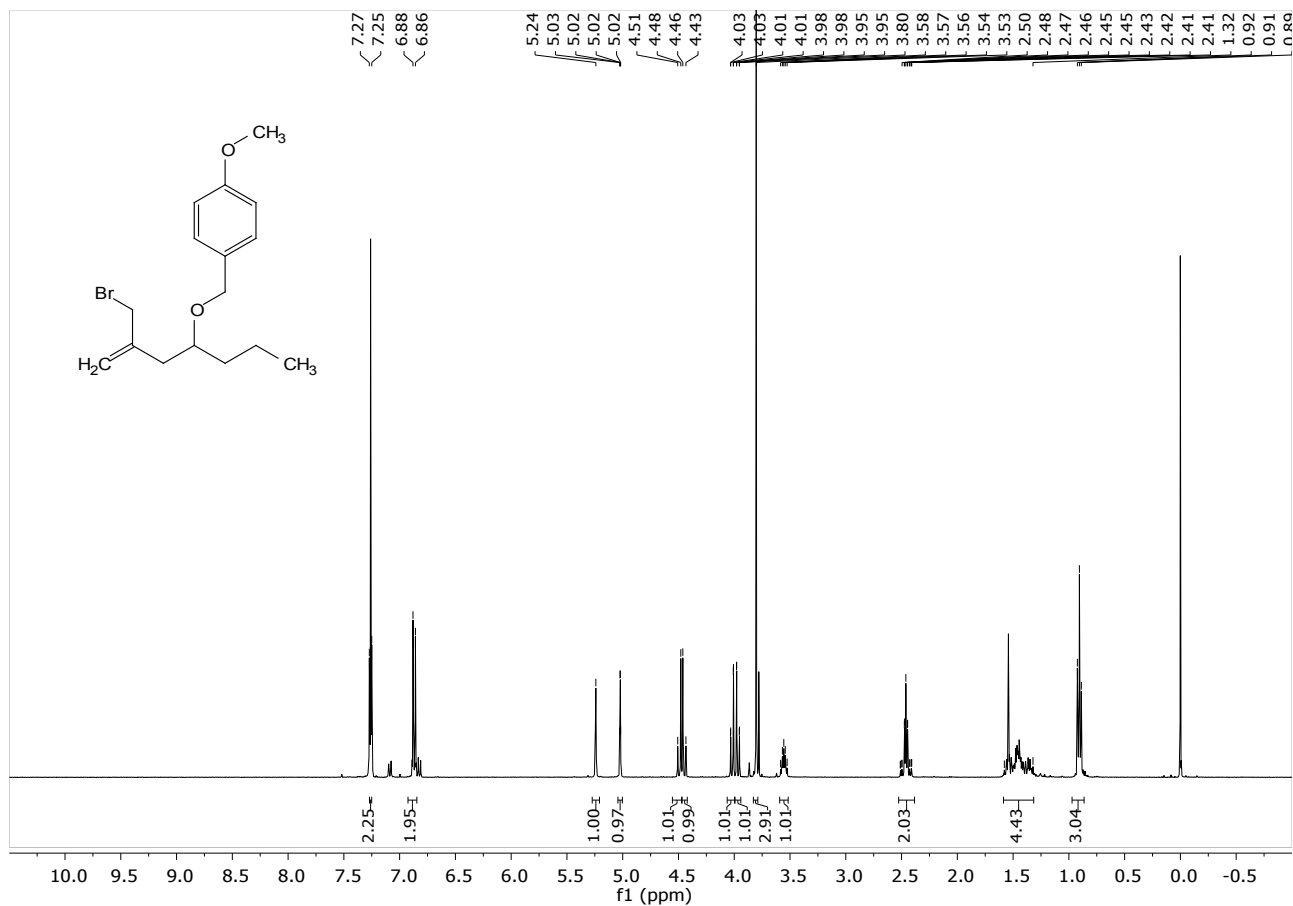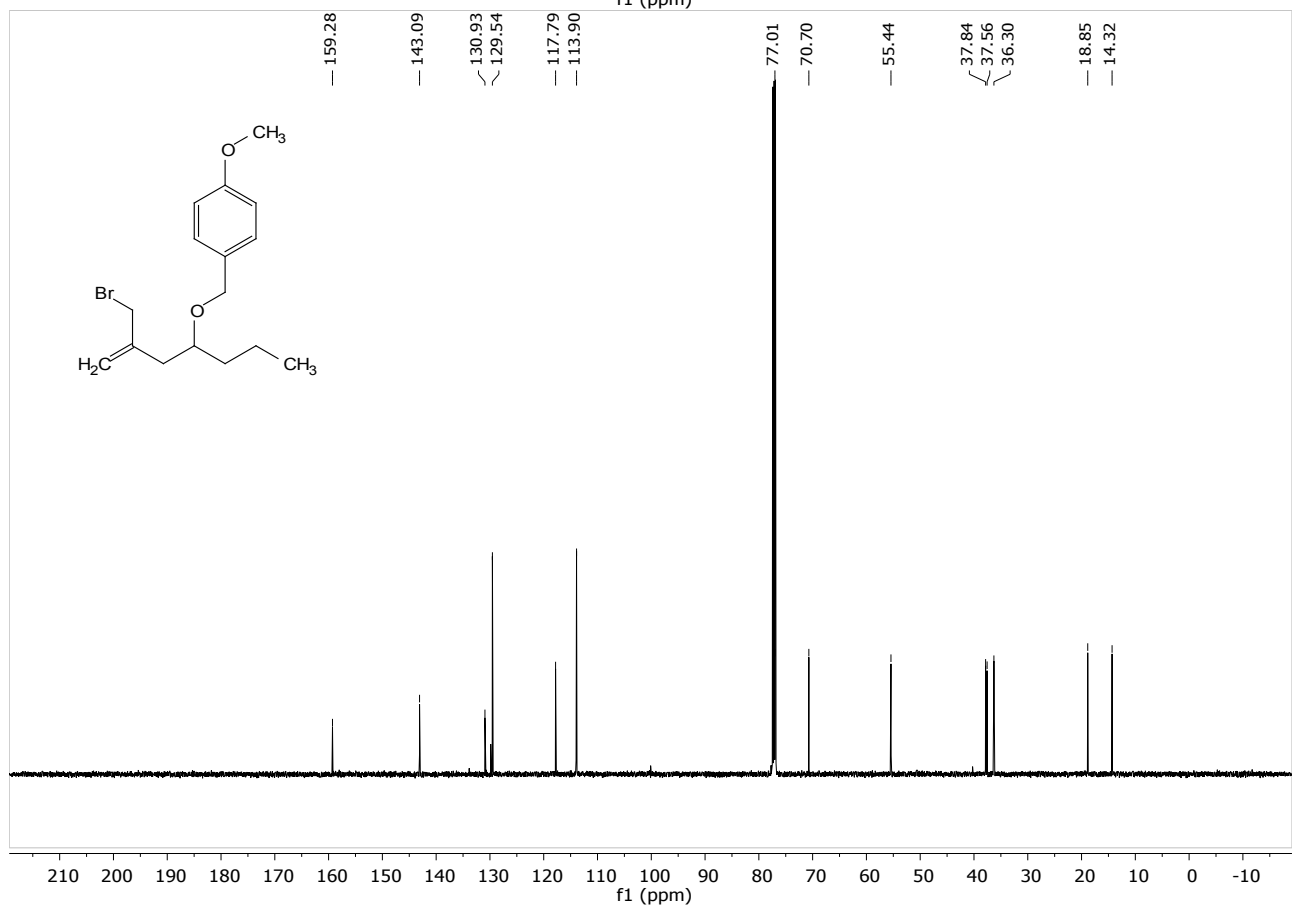

# Dimethyl(2-methyleneheptyl)silane 9a

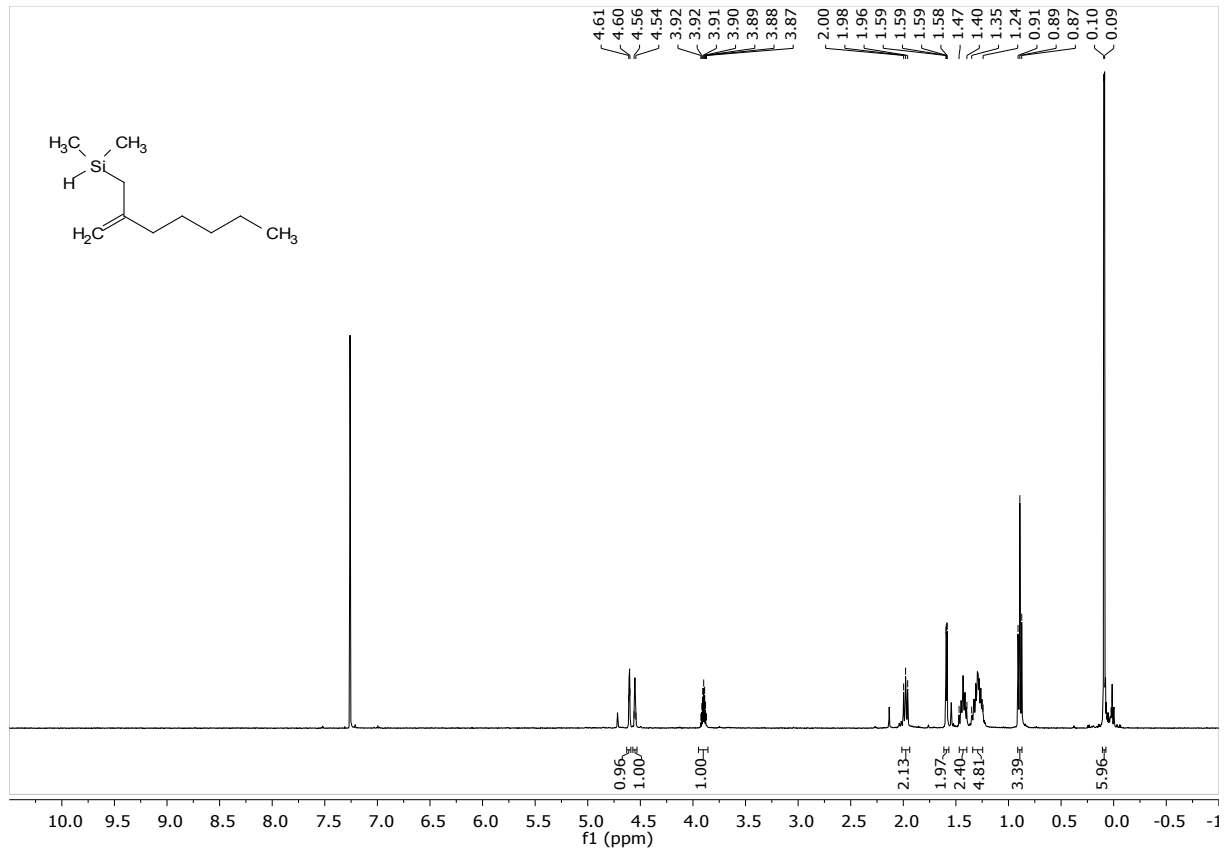

**(2-((Dimethylsilyl)methyl)hept-1-en-4-yloxy)triethylsilane 9b**

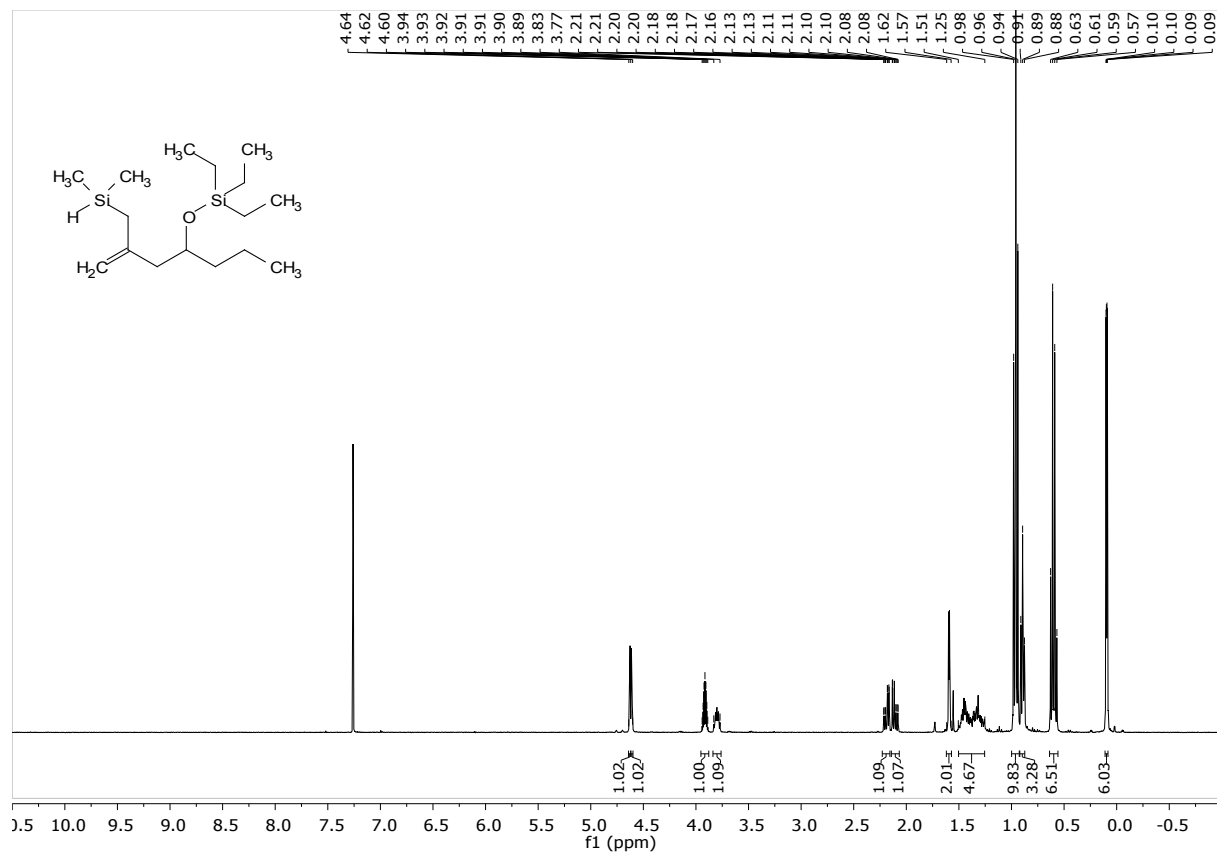

**(4-(Benzyloxy)-2-methyleneheptyl)dimethylsilane 9c**

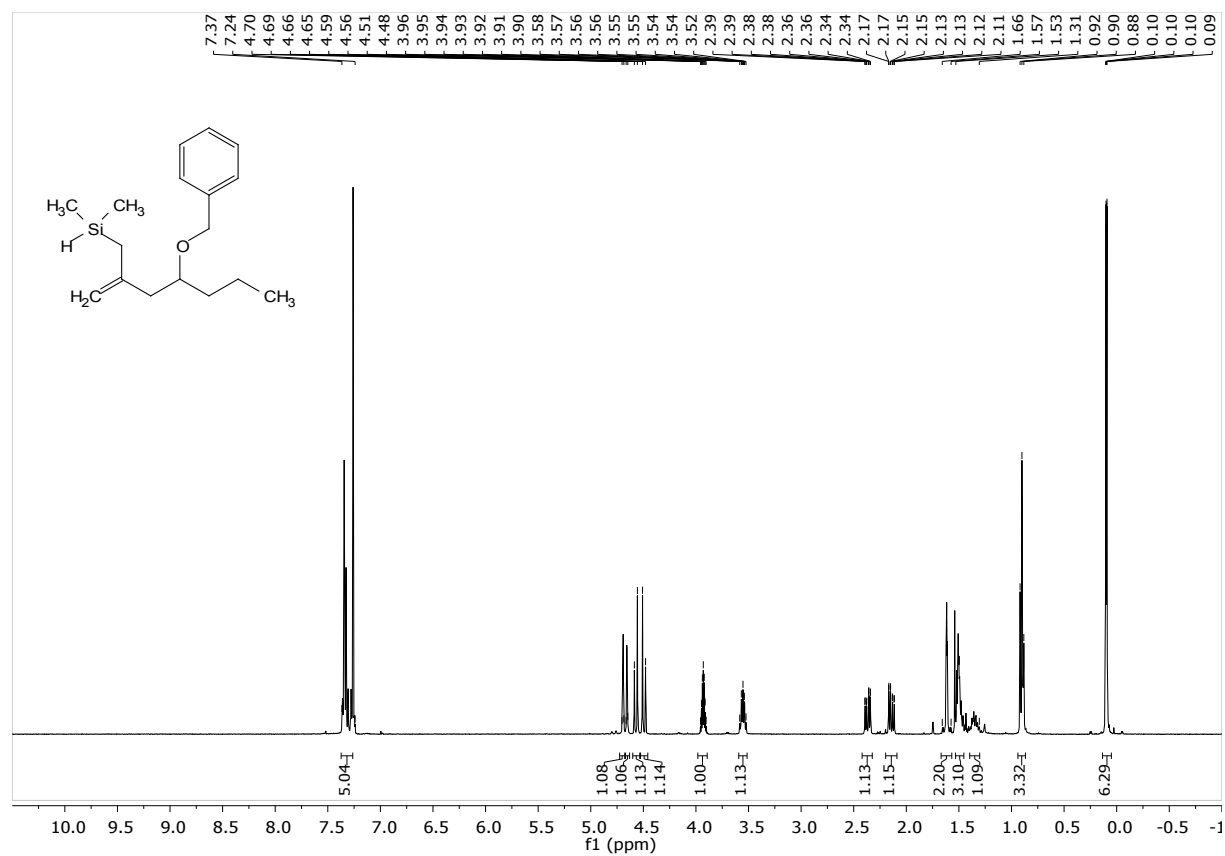

**Dimethyl(2-methyleneheptyl)(5-phenylpent-1-en-3-yloxy)silane 8a**

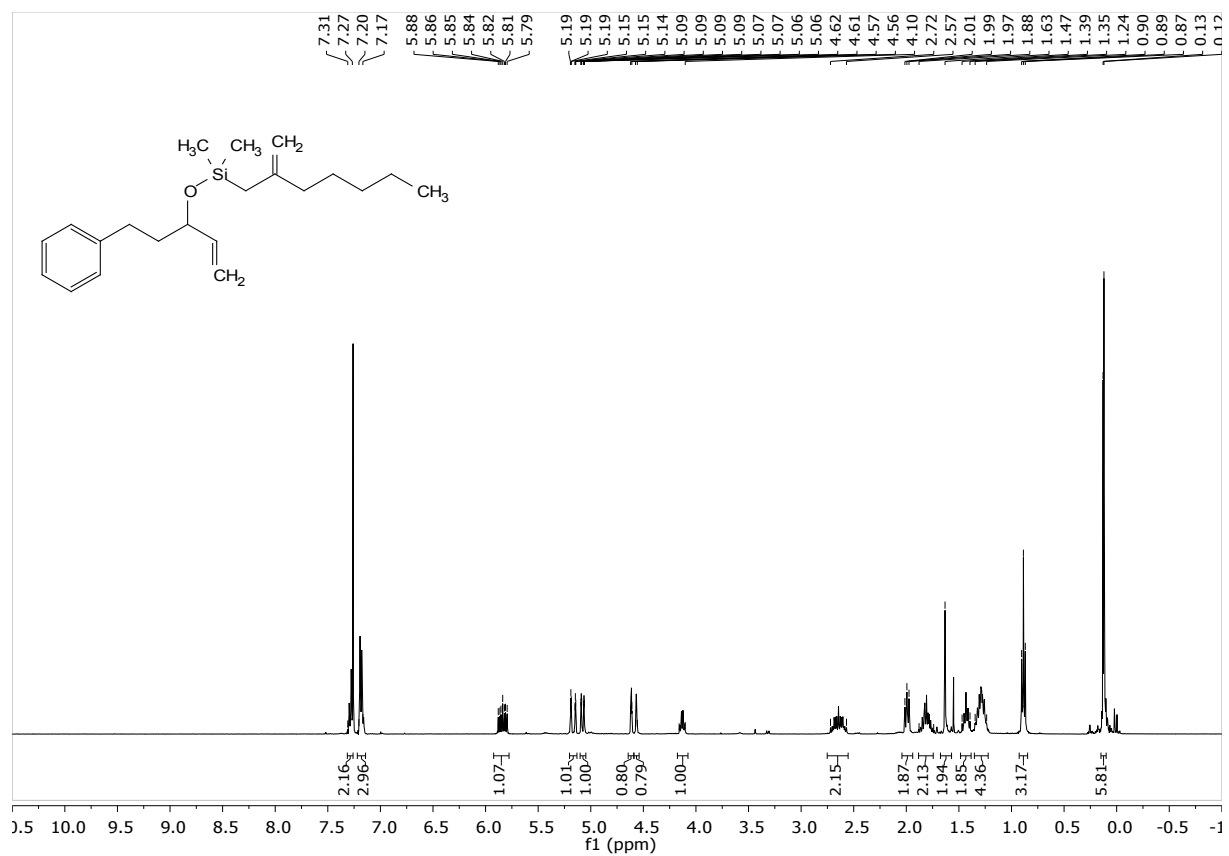

**3,3-Diethyl-9,9-dimethyl-7-methylene-11-phenethyl-5-propyl-4,10-dioxa-3,9-disilatridec-12-ene 8b**

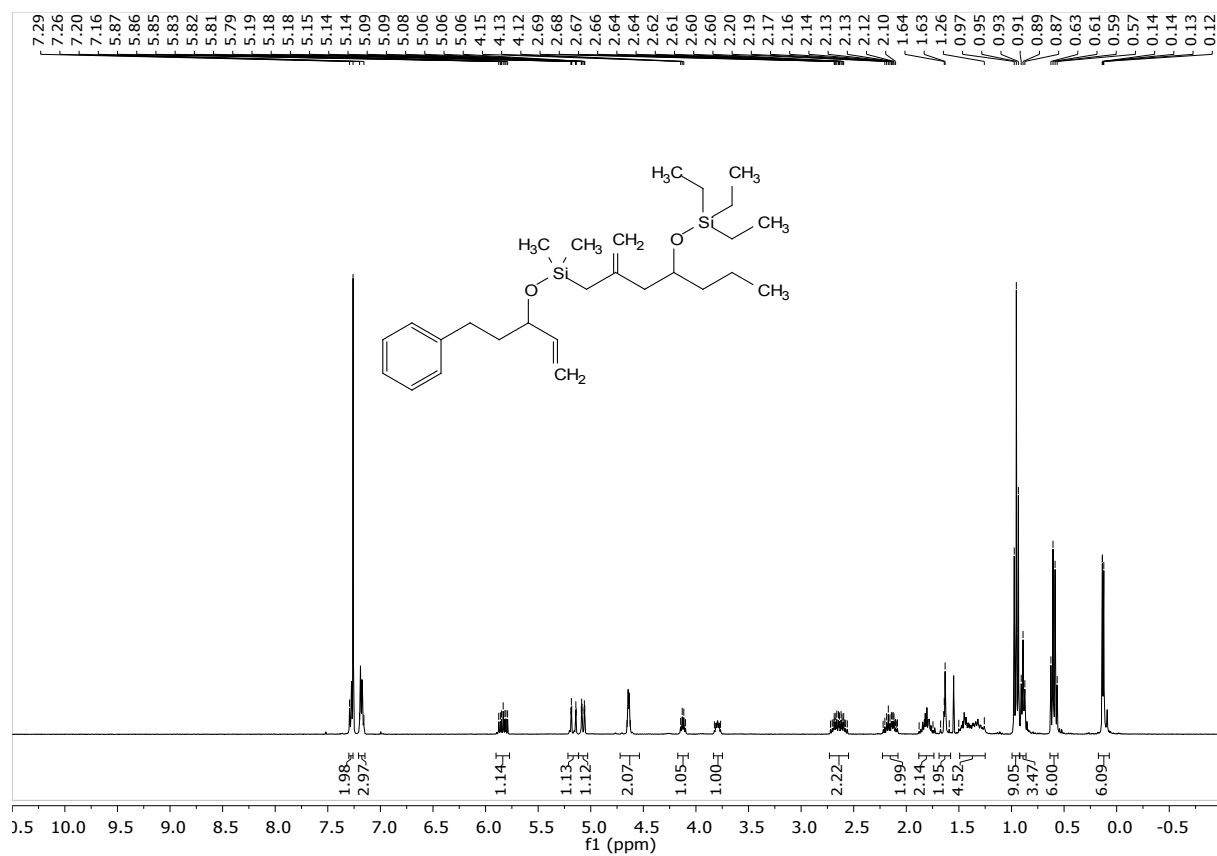

**(4-(Benzyloxy)-2-methyleneheptyl)dimethyl((5-phenylpent-1-en-3-yl)oxy)silane 8c**

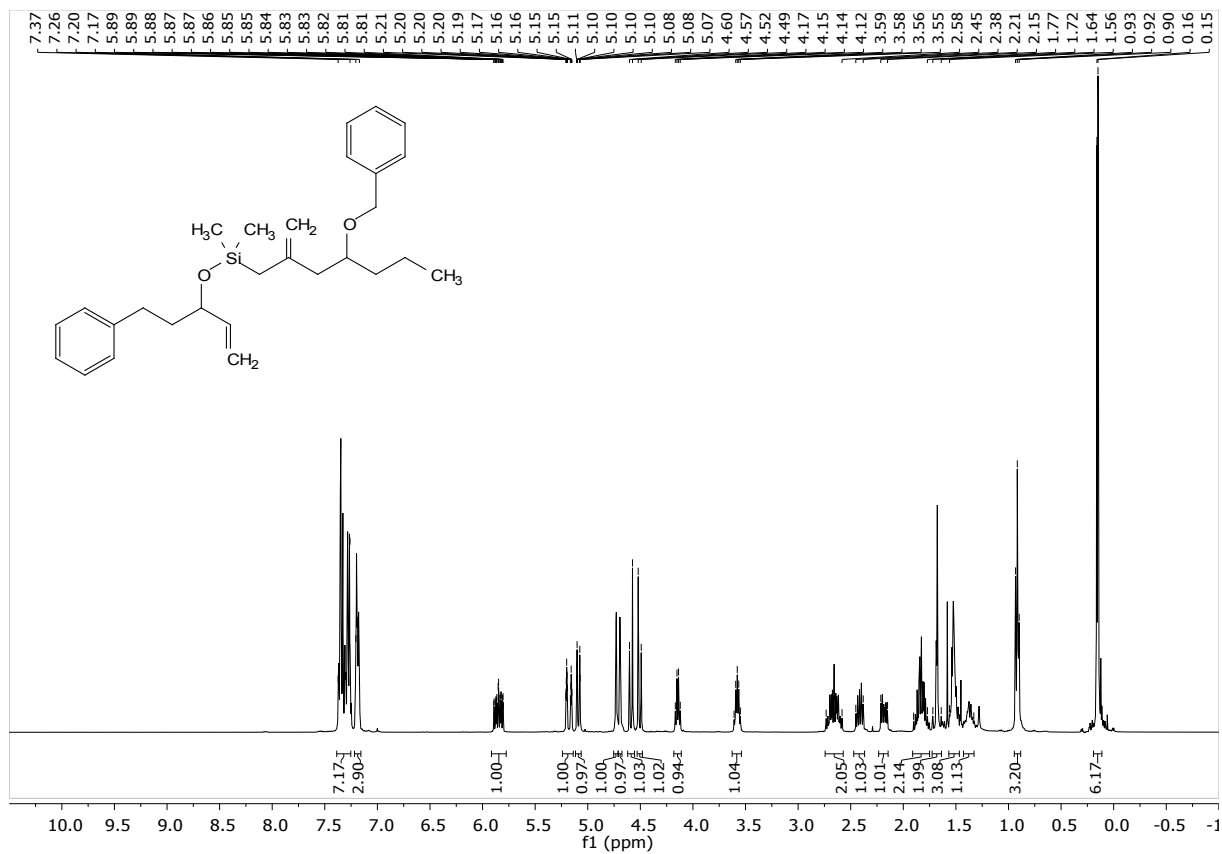



**(Z)-1-Phenyl-7-(triethylsilyloxy)-5-((trimethylsilyl)methyl)dec-4-en-3-ol 11b**

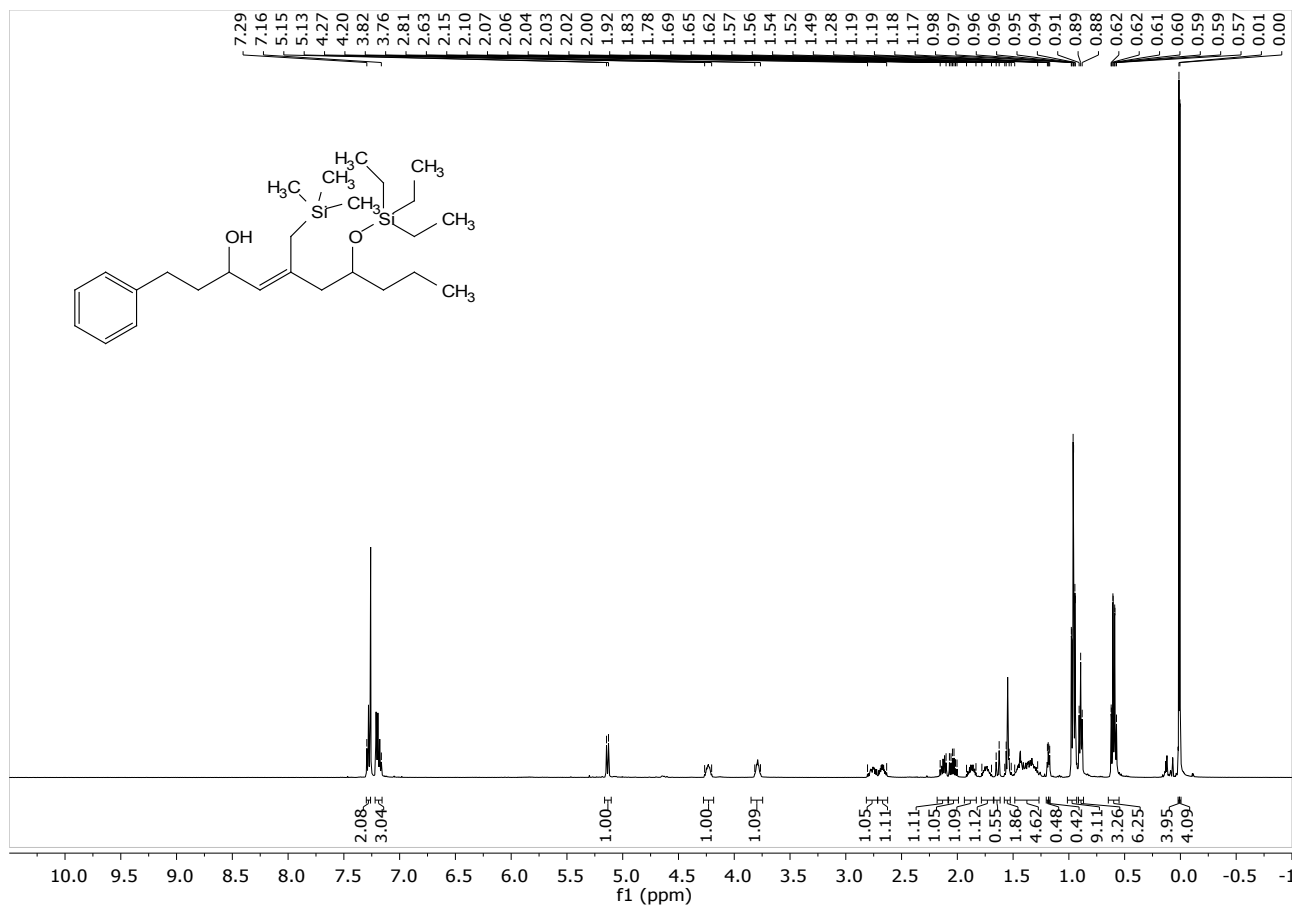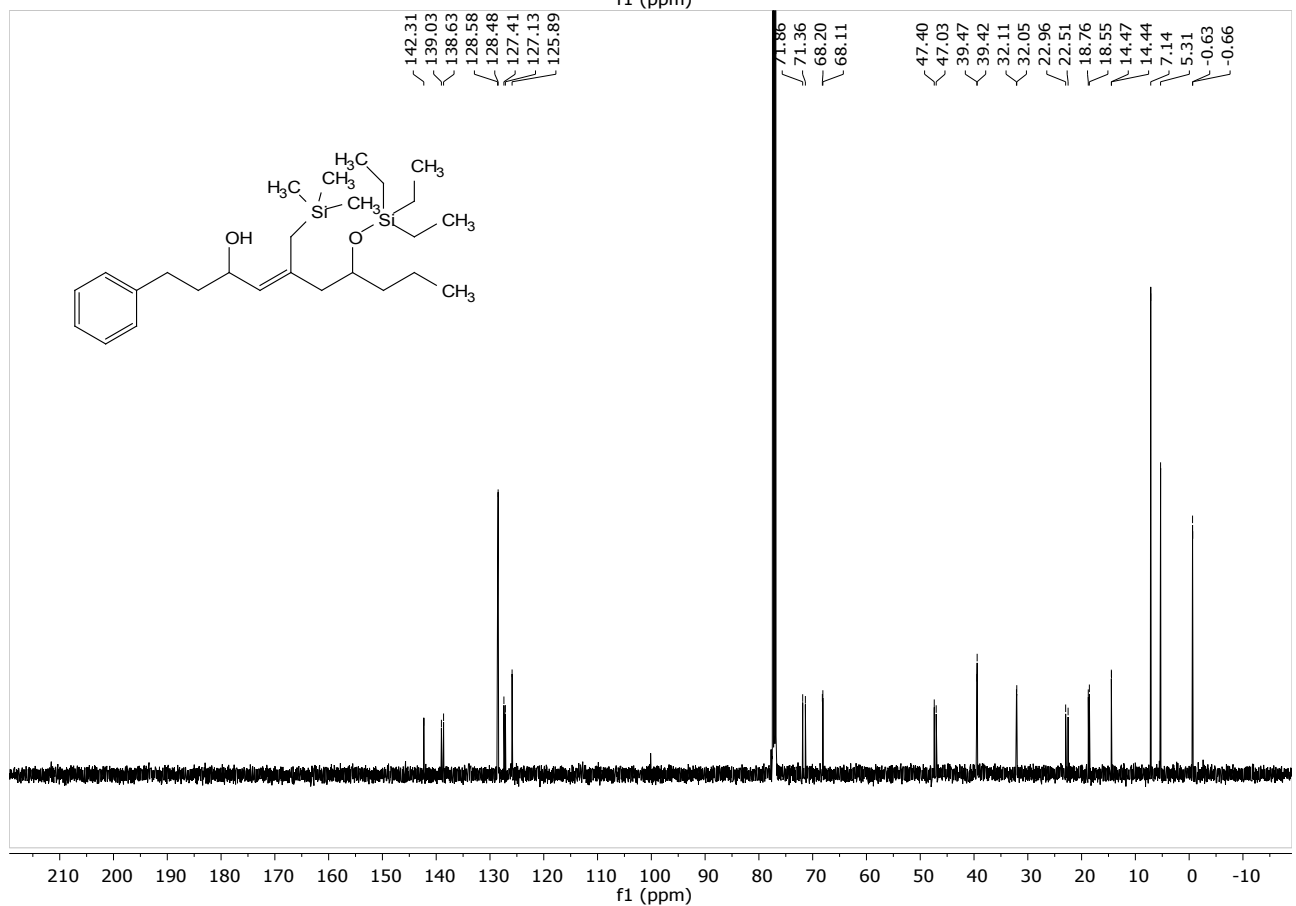



# 5-Methylene-1-phenyldecane-3,7-diol 13b

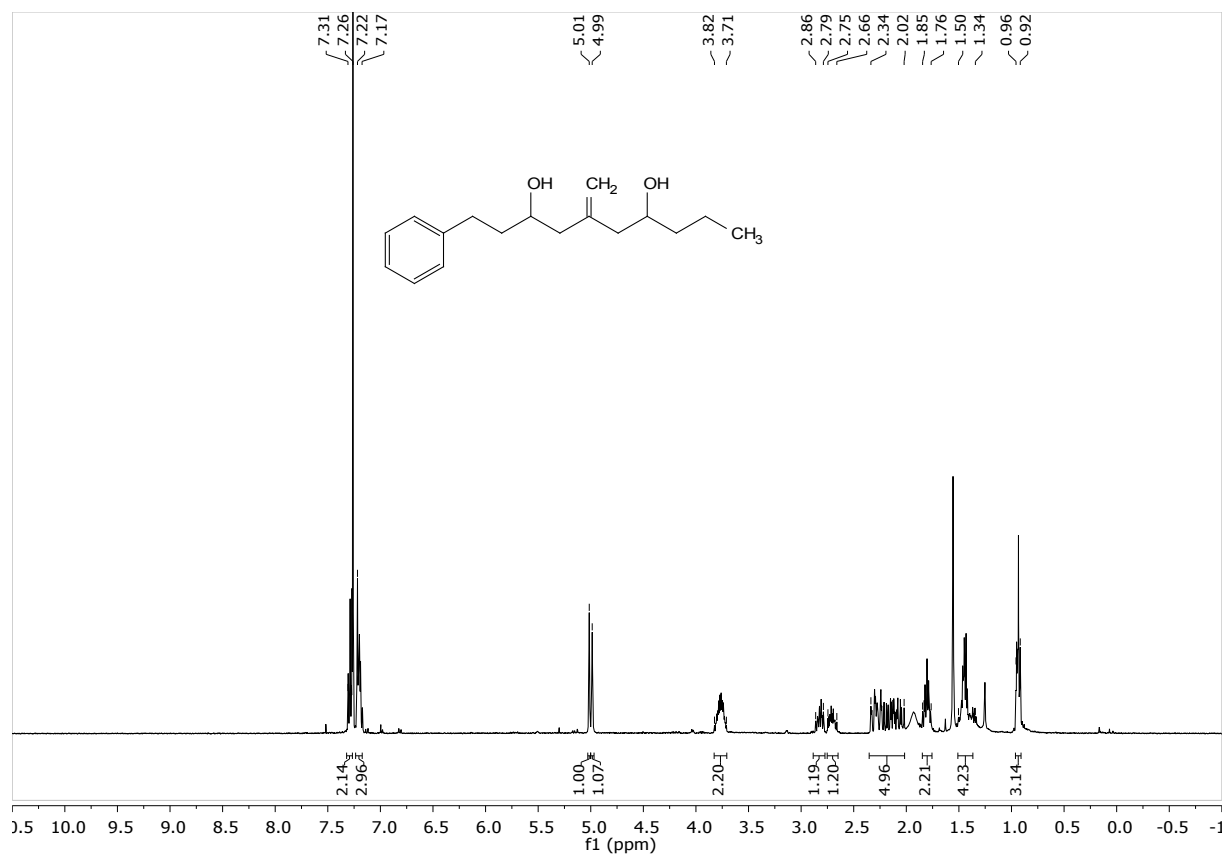

**(E)-5-Methyl-1-phenyldec-4-en-3-ol 12a**

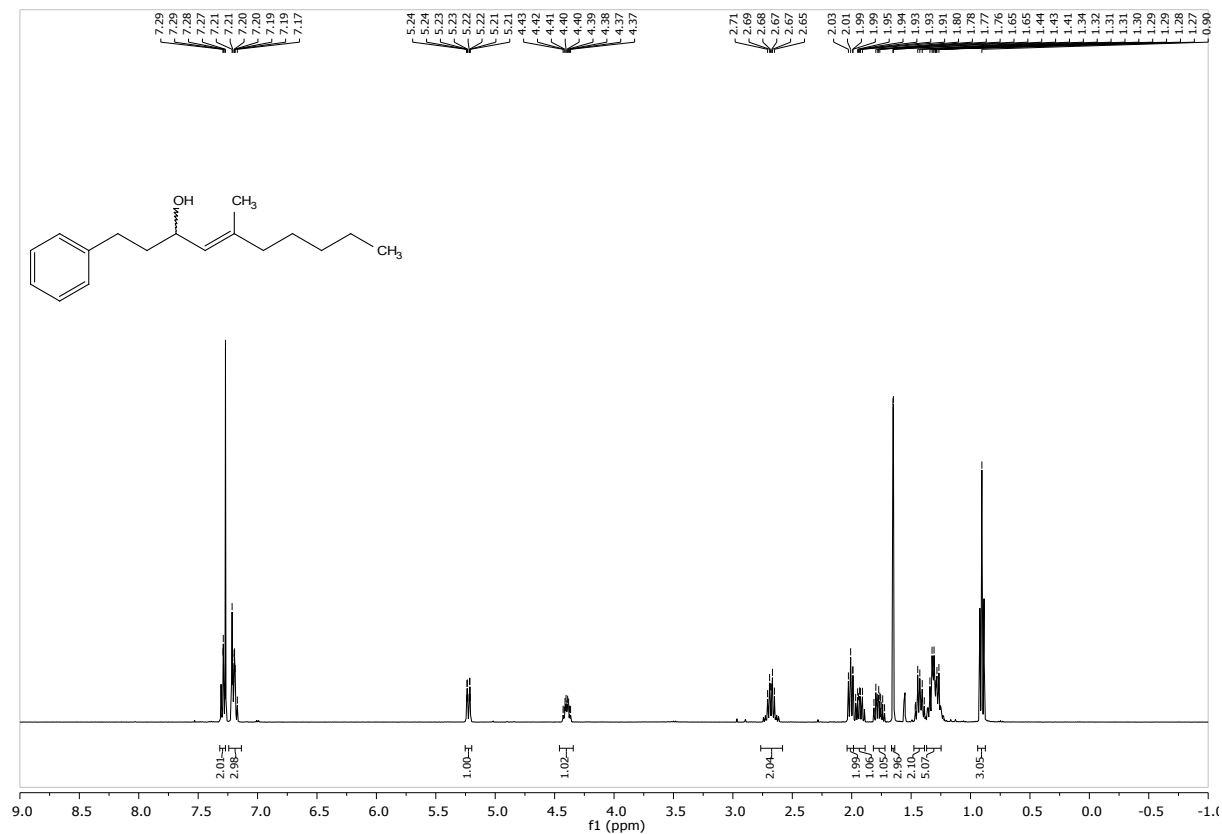

# 5-Methylene-1-phenyldecan-3-ol 13a

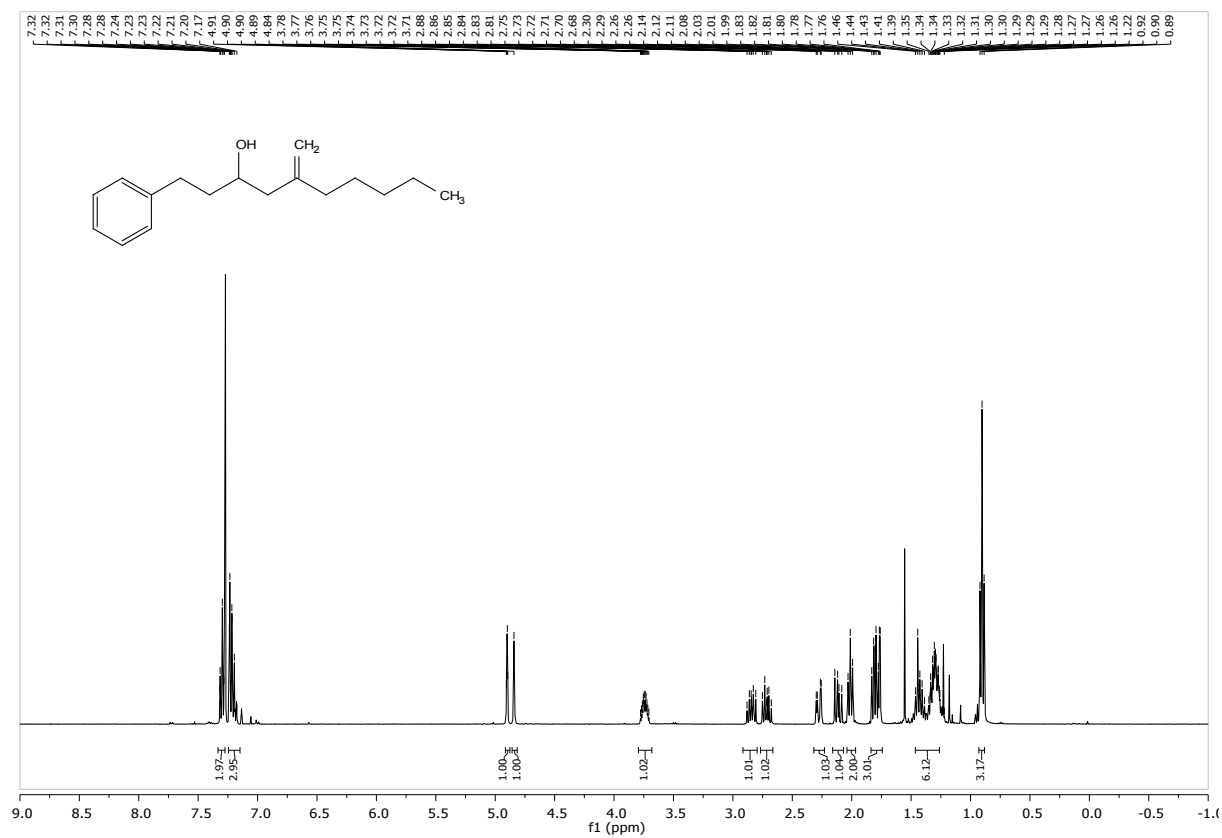

# Chlorodimethyl(2-methylallyl)silane

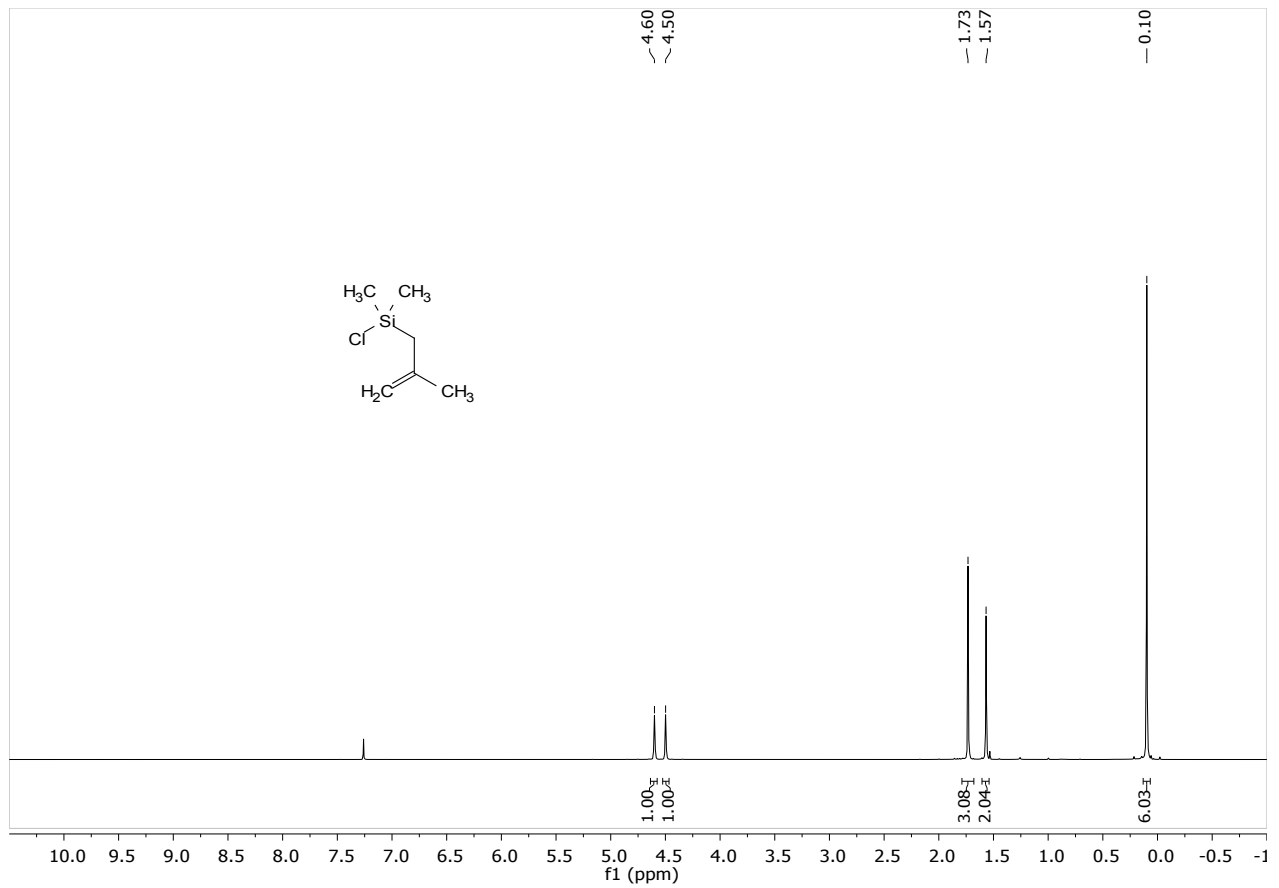

**Dimethyl(7-methylallyl)((5-phenylpent-1-en-3-yl)oxy)silane 15**

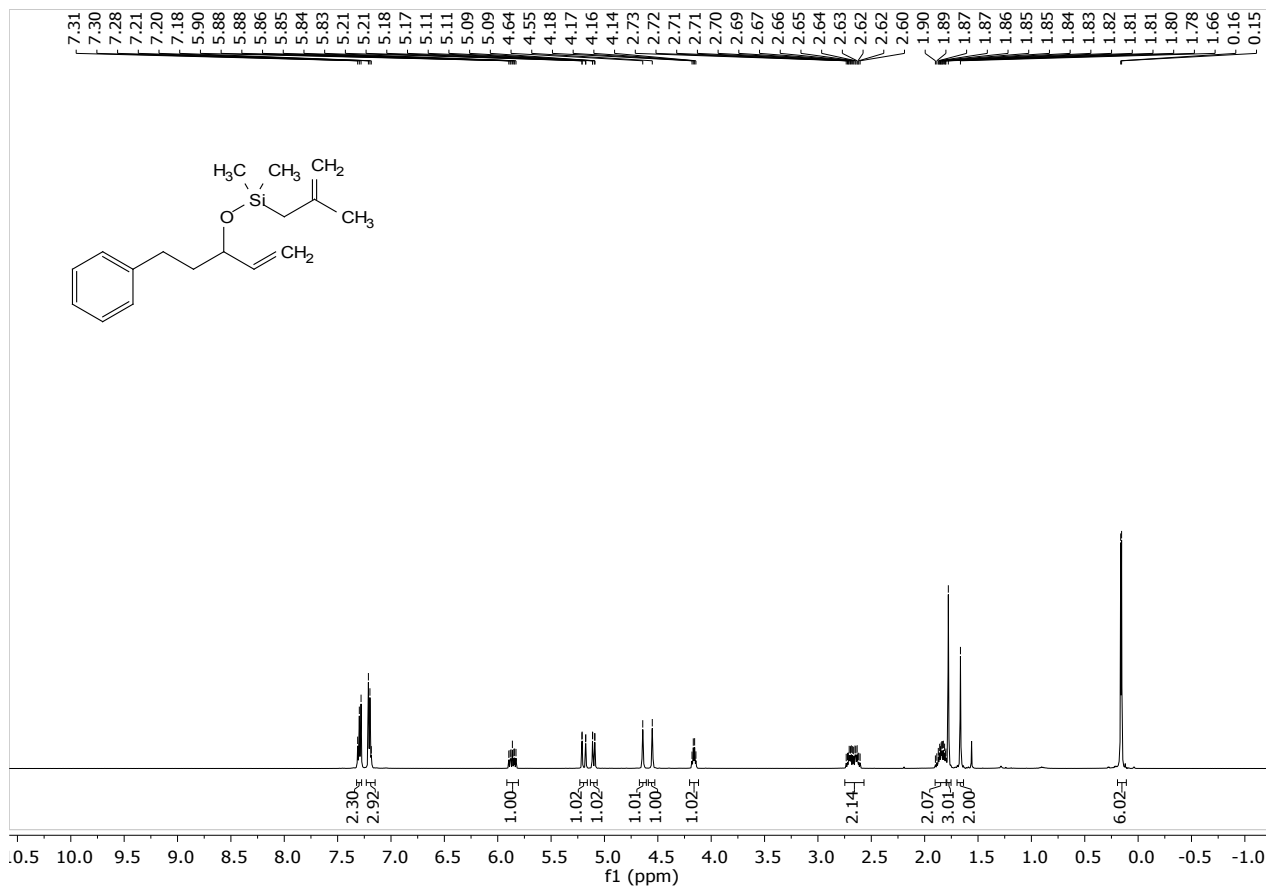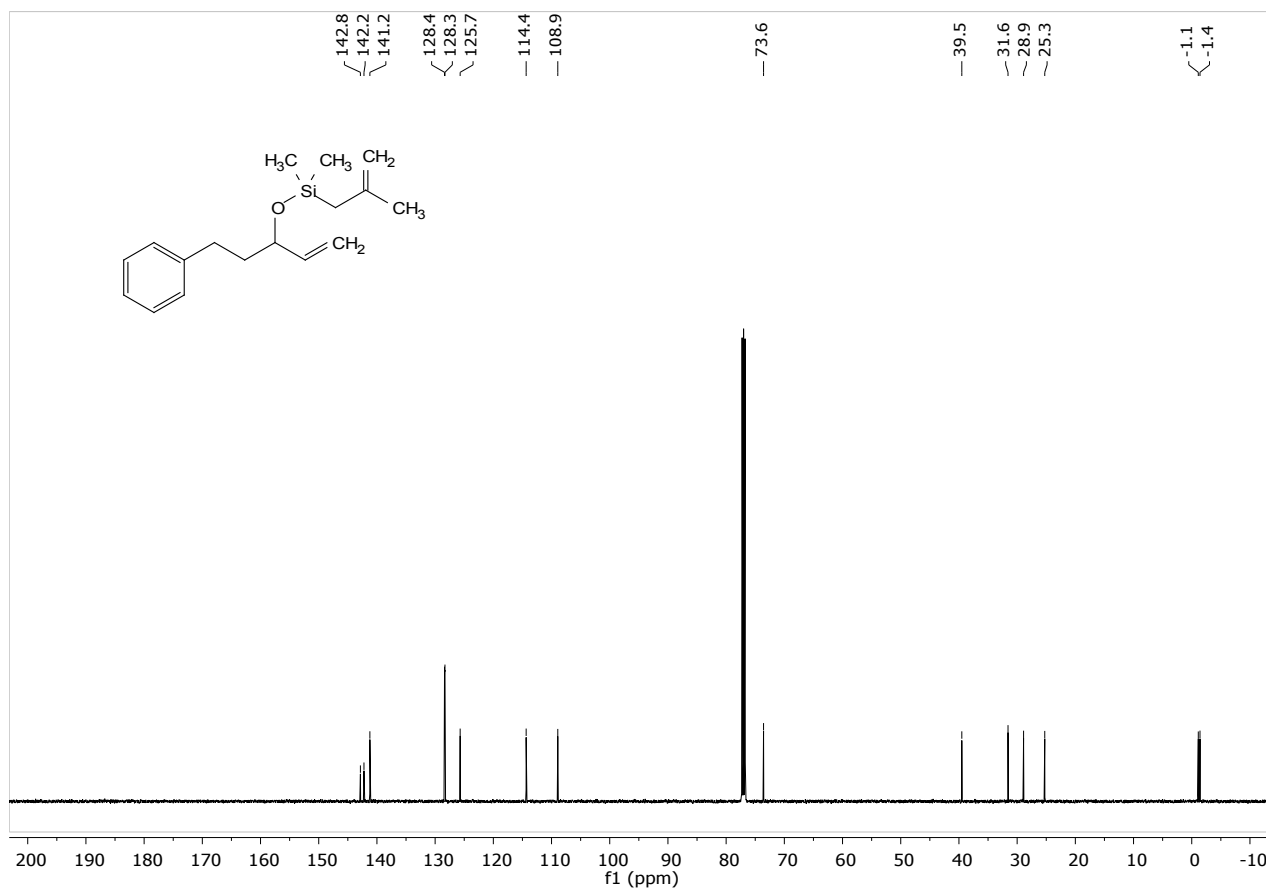

**5,8,8-Trimethyl-3-phenethyl-3,9-dihydro-2H-8,9-oxasiline 16**

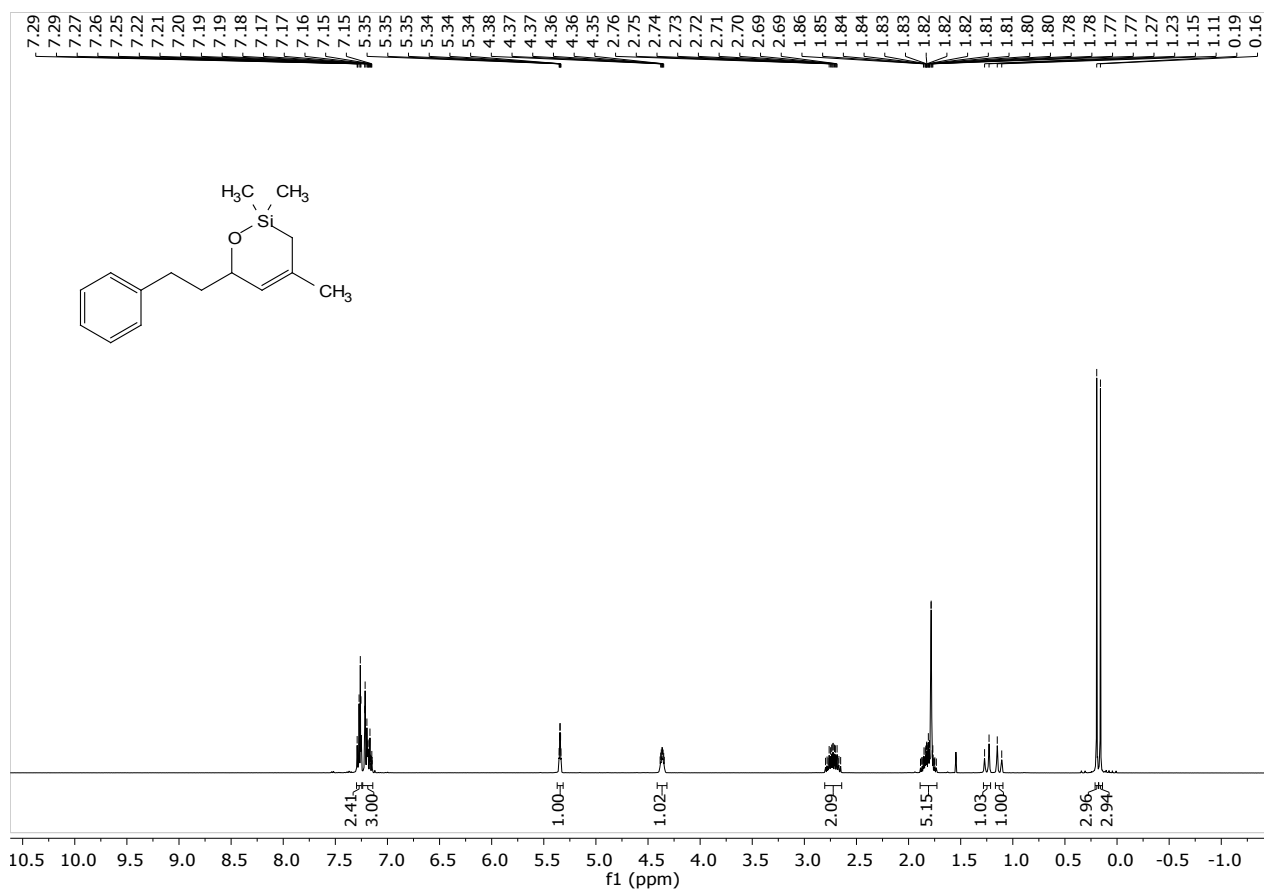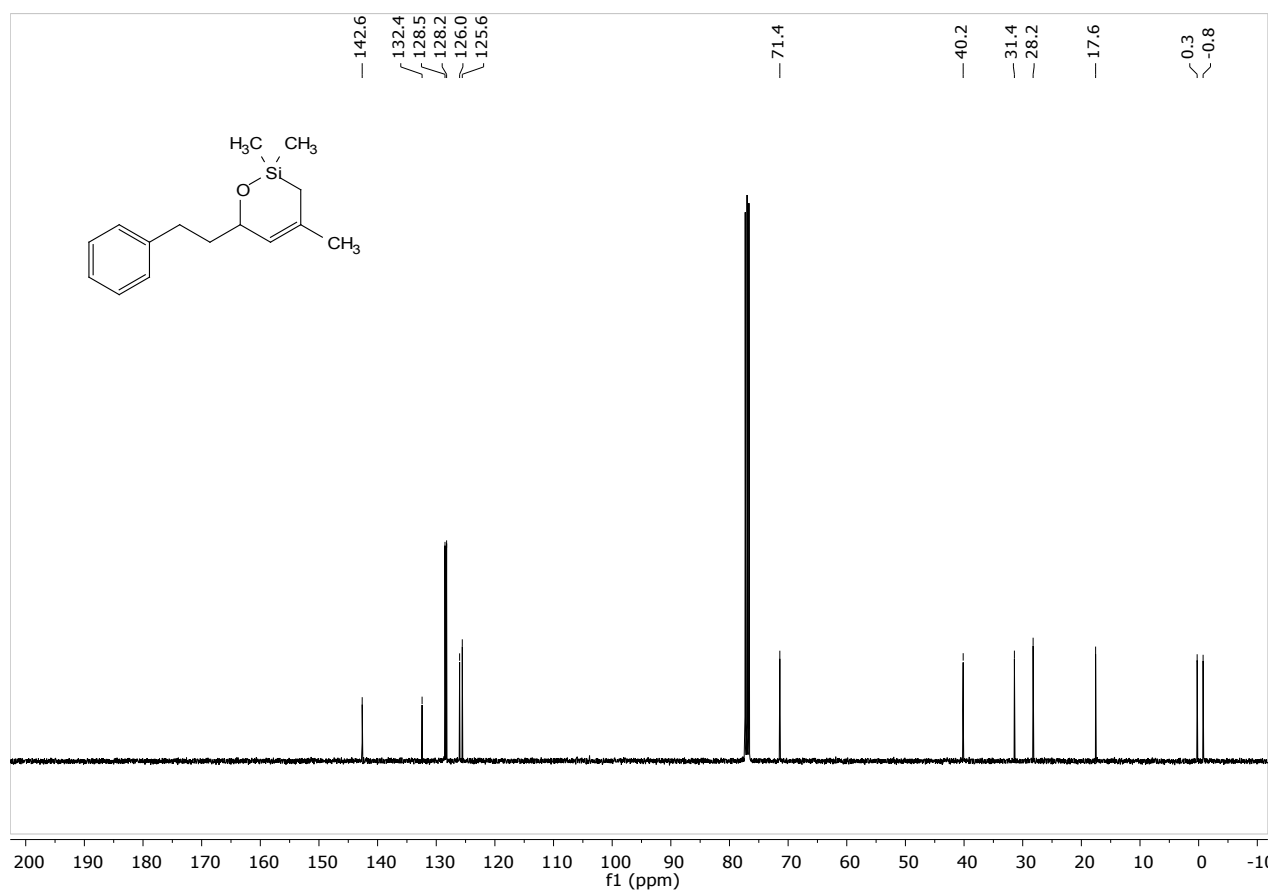



**(Z)-2-Methyl-6-phenylhex-2-ene-1,4-diol 17**

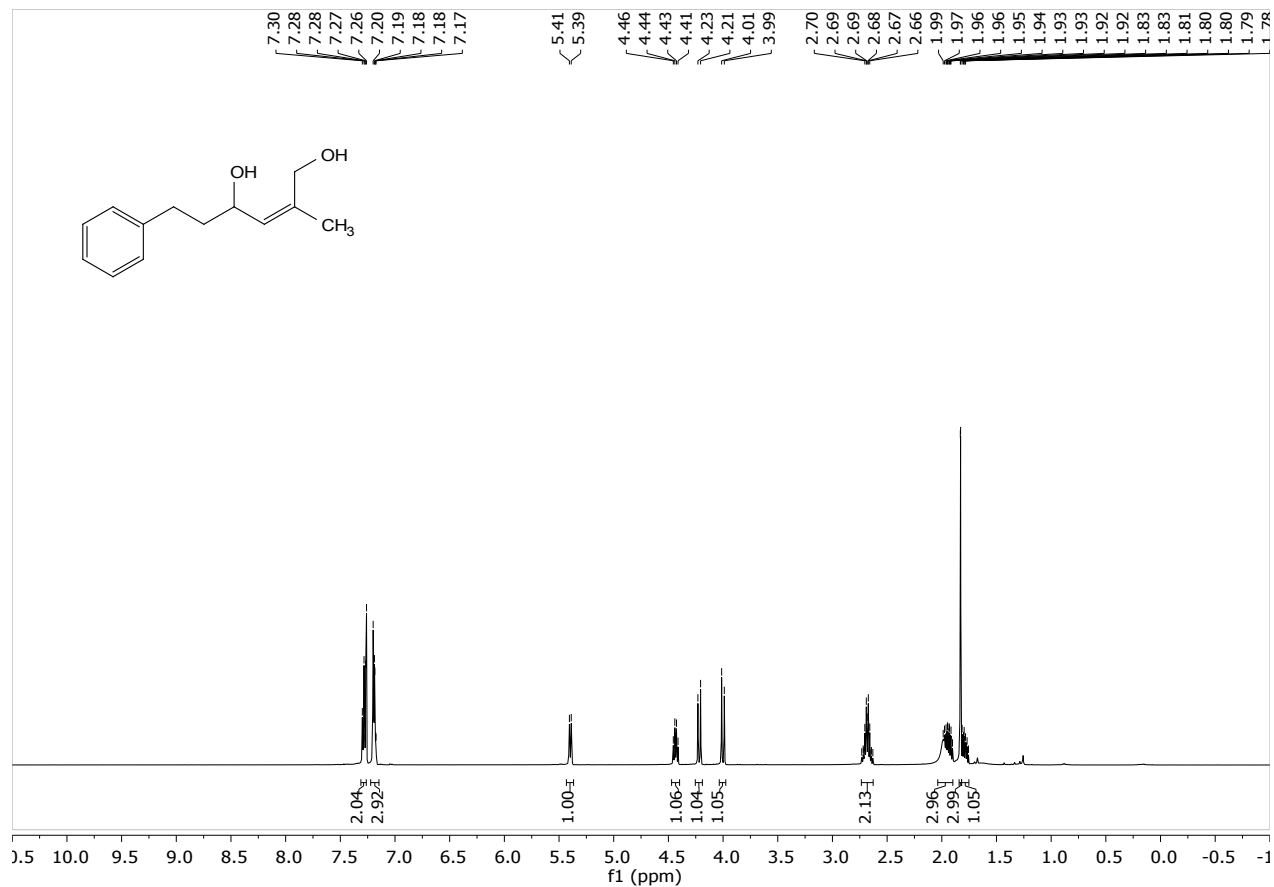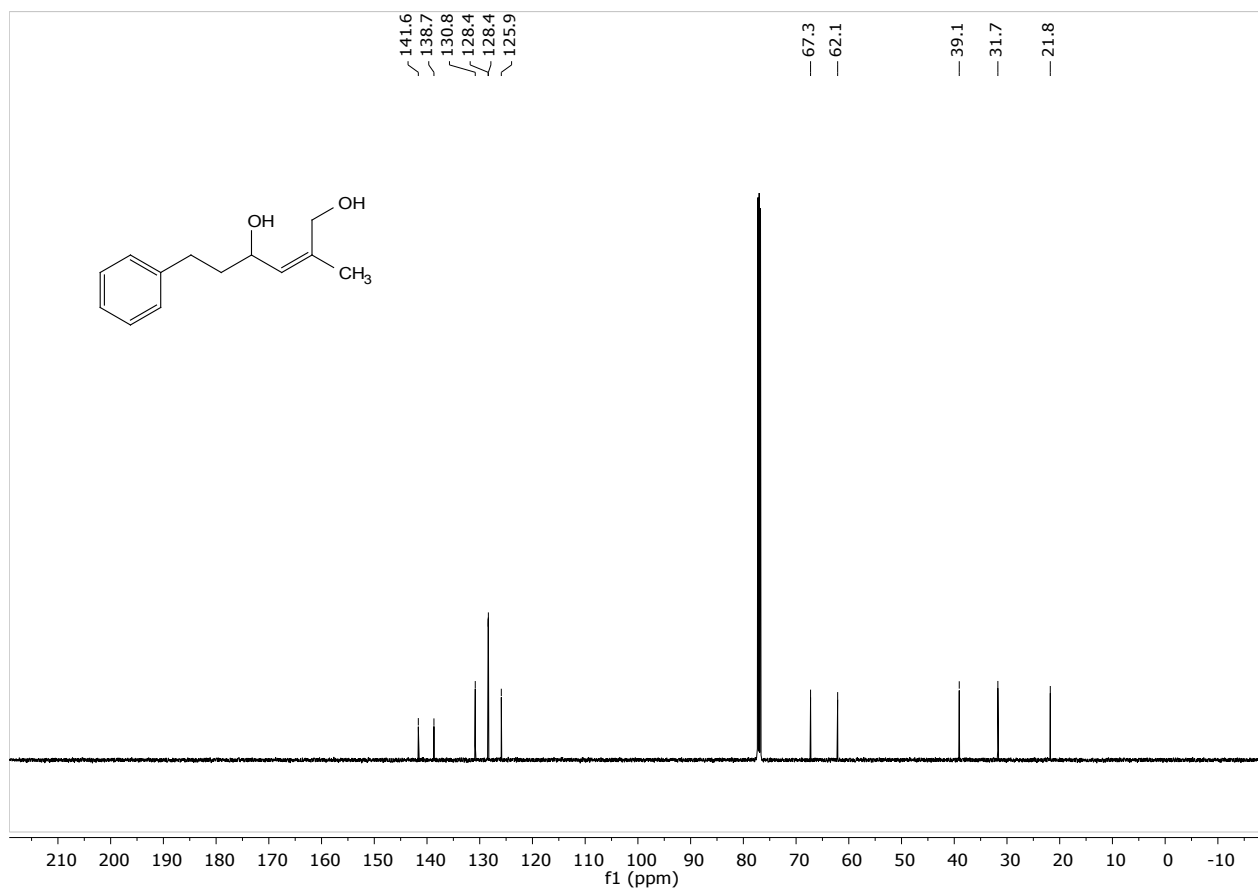

Supplement: c9ob02563d1.pdf [file c9ob02563d1.pdf]
